# Supplementary material for: Diisoprenyl Cyclohexene-Type Meroterpenoids with Cytotoxic Activity from a Mangrove Endophytic Fungus Aspergillus sp. GXNU-Y85
Source: MDPI journal article supplement (doi:10.3390/md22020058), 2024-01-24
Supplement: s1 [file s1]

## Supporting Information

# Diisoprenyl Cyclohexene-Type Meroterpenoids with Cytotoxic Activity from a Mangrove Endophytic Fungus *Aspergillus* sp. GXNU-Y85

Feng Qin 1,2,†, Zi-Shuo Song 1,†, Li Luo 1, Xiang-Long Bo 1, Fu-Rong Wu 1, Mei-Jing Tan 1,  
Fan-Fan Wang 2, Xi-Shan Huang 1,\* and Heng-Shan Wang 1,\*

1 State Key Laboratory for Chemistry and Molecular Engineering of Medicinal Resources/Key Laboratory  
for Chemistry and Molecular Engineering of Medicinal Resources (Ministry of Education of China),  
Collaborative Innovation Center for Guangxi Ethnic Medicine, School of Chemistry and Pharmaceutical  
Sciences, Guangxi Normal University, Guilin 541004, China; qinf1114@163.com (F.Q.);  
zishuos@163.com (Z.-S.S.); luoli51598@163.com (L.L.); bxl4937@foxmail.com (X.-L.B.);  
xingkong2137@gmail.com (F.-R.W.); tanmeijing2022@163.com (M.-J.T.)

2 Guangxi Key Laboratory of Agricultural Resources Chemistry and Biotechnology, College of Chemistry  
and Food Science, Yulin Normal University, Yulin 537000, China; fanfanwang2020@163.com

\* Correspondence: huangxishan13@foxmail.com (X.-S.H.); whengshan@163.com (H.-S.W.)

† These authors contributed equally to this work.

## Contents

|                                                                                                           |    |
|-----------------------------------------------------------------------------------------------------------|----|
| Figure S1 $^1\text{H}$ NMR spectrum of compound <b>1</b> in $\text{CD}_3\text{OD}$ .....                  | 4  |
| Figure S2 $^{13}\text{C}$ NMR spectrum of compound <b>1</b> in $\text{CD}_3\text{OD}$ .....               | 4  |
| Figure S3 $^1\text{H}$ - $^1\text{H}$ COSY spectrum of compound <b>1</b> in $\text{CD}_3\text{OD}$ .....  | 5  |
| Figure S4 HSQC spectrum of compound <b>1</b> in $\text{CD}_3\text{OD}$ .....                              | 5  |
| Figure S5 HMBC spectrum of compound <b>1</b> in $\text{CD}_3\text{OD}$ .....                              | 6  |
| Figure S6 NOESY spectrum of compound <b>1</b> in $\text{CD}_3\text{OD}$ .....                             | 6  |
| Figure S7 HR-ESI-MS spectrum of compound <b>1</b> .....                                                   | 7  |
| Figure S8 UV spectrum of compound <b>1</b> .....                                                          | 7  |
| Figure S9 IR spectrum of compound <b>1</b> .....                                                          | 8  |
| Figure S10 $^1\text{H}$ NMR spectrum of compound <b>2</b> in $\text{CD}_3\text{OD}$ .....                 | 8  |
| Figure S11 $^{13}\text{C}$ NMR spectrum of compound <b>2</b> in $\text{CD}_3\text{OD}$ .....              | 9  |
| Figure S12 $^1\text{H}$ - $^1\text{H}$ COSY spectrum of compound <b>2</b> in $\text{CD}_3\text{OD}$ ..... | 9  |
| Figure S13 HSQC spectrum of compound <b>2</b> in $\text{CD}_3\text{OD}$ .....                             | 10 |
| Figure S14 HMBC spectrum of compound <b>2</b> in $\text{CD}_3\text{OD}$ .....                             | 10 |
| Figure S15 NOESY spectrum of compound <b>2</b> in $\text{CD}_3\text{OD}$ .....                            | 11 |
| Figure S16 HR-ESI-MS spectrum of compound <b>2</b> .....                                                  | 11 |
| Figure S17 UV spectrum of compound <b>2</b> .....                                                         | 12 |
| Figure S18 IR spectrum of compound <b>2</b> .....                                                         | 12 |
| Figure S19 $^1\text{H}$ NMR spectrum of compound <b>3</b> in $\text{CD}_3\text{OD}$ .....                 | 13 |
| Figure S20 $^{13}\text{C}$ NMR spectrum of compound <b>3</b> in $\text{CD}_3\text{OD}$ .....              | 13 |
| Figure S21 $^1\text{H}$ - $^1\text{H}$ COSY spectrum of compound <b>3</b> in $\text{CD}_3\text{OD}$ ..... | 14 |
| Figure S22 HSQC spectrum of compound <b>3</b> in $\text{CD}_3\text{OD}$ .....                             | 14 |
| Figure S23 HMBC spectrum of compound <b>3</b> in $\text{CD}_3\text{OD}$ .....                             | 15 |
| Figure S24 NOESY spectrum of compound <b>3</b> in $\text{CD}_3\text{OD}$ .....                            | 15 |
| Figure S25 HR-ESI-MS spectrum of compound <b>3</b> .....                                                  | 16 |
| Figure S26 UV spectrum of compound <b>3</b> .....                                                         | 16 |
| Figure S27 IR spectrum of compound <b>3</b> .....                                                         | 17 |
| Figure S28 $^1\text{H}$ NMR spectrum of compound <b>4</b> in $\text{CD}_3\text{OD}$ .....                 | 17 |
| Figure S29 $^{13}\text{C}$ NMR spectrum of compound <b>4</b> in $\text{CD}_3\text{OD}$ .....              | 18 |
| Figure S30 $^1\text{H}$ - $^1\text{H}$ COSY spectrum of compound <b>4</b> in $\text{CD}_3\text{OD}$ ..... | 18 |
| Figure S31 HSQC spectrum of compound <b>4</b> in $\text{CD}_3\text{OD}$ .....                             | 19 |
| Figure S32 HMBC spectrum of compound <b>4</b> in $\text{CD}_3\text{OD}$ .....                             | 19 |
| Figure S33 NOESY spectrum of compound <b>4</b> in $\text{CD}_3\text{OD}$ .....                            | 20 |
| Figure S34 HR-ESI-MS spectrum of compound <b>4</b> .....                                                  | 20 |
| Figure S35 UV spectrum of compound <b>4</b> .....                                                         | 21 |
| Figure S36 IR spectrum of compound <b>4</b> .....                                                         | 21 |
| Figure S37 $^1\text{H}$ NMR spectrum of compound <b>5</b> in $\text{CD}_3\text{OD}$ .....                 | 22 |
| Figure S38 $^{13}\text{C}$ NMR spectrum of compound <b>5</b> in $\text{CD}_3\text{OD}$ .....              | 22 |
| Figure S39 $^1\text{H}$ - $^1\text{H}$ COSY spectrum of compound <b>5</b> in $\text{CD}_3\text{OD}$ ..... | 23 |
| Figure S40 HSQC spectrum of compound <b>5</b> in $\text{CD}_3\text{OD}$ .....                             | 23 |
| Figure S41 HMBC spectrum of compound <b>5</b> in $\text{CD}_3\text{OD}$ .....                             | 24 |
| Figure S42 NOESY spectrum of compound <b>5</b> in $\text{CD}_3\text{OD}$ .....                            | 24 |
| Figure S43 HR-ESI-MS spectrum of compound <b>5</b> .....                                                  | 25 |

|                                                                                                                                                      |    |
|------------------------------------------------------------------------------------------------------------------------------------------------------|----|
| Figure S44 UV spectrum of compound <b>5</b> .....                                                                                                    | 25 |
| Figure S45 IR spectrum of compound <b>5</b> .....                                                                                                    | 26 |
| Computational Section.....                                                                                                                           | 26 |
| ECD calculation .....                                                                                                                                | 26 |
| Table S1. Energies of the dominative conformers of compounds <b>1-5</b> . ....                                                                       | 27 |
| <sup>13</sup> C NMR calculation.....                                                                                                                 | 28 |
| Figure S46 Conformations of low-energy conformers of structures <b>3a</b> and <b>3b</b> . ....                                                       | 28 |
| Table S2 DP4+ analysis result table of model compounds <b>3a</b> and <b>3b</b> . ....                                                                | 29 |
| Figure S47 DP4+ probability analysis result. ....                                                                                                    | 30 |
| Table S3. <sup>1</sup> H (400 MHz) and <sup>13</sup> C (100 MHz) NMR, and COSY, HMBC and NOESY<br>assignment of <b>1</b> in CD <sub>3</sub> OD. .... | 30 |
| Table S4. <sup>1</sup> H (400 MHz) and <sup>13</sup> C (100 MHz) NMR, and COSY, HMBC and NOESY<br>assignment of <b>2</b> in CD <sub>3</sub> OD. .... | 31 |
| Table S5. <sup>1</sup> H (400 MHz) and <sup>13</sup> C (100 MHz) NMR, and COSY, HMBC and NOESY<br>assignment of <b>3</b> in CD <sub>3</sub> OD. .... | 31 |
| Table S6. <sup>1</sup> H (400 MHz) and <sup>13</sup> C (100 MHz) NMR, and COSY, HMBC and NOESY<br>assignment of <b>4</b> in CD <sub>3</sub> OD. .... | 32 |
| Table S7. <sup>1</sup> H (400 MHz) and <sup>13</sup> C (100 MHz) NMR, and COSY, HMBC and NOESY<br>assignment of <b>5</b> in CD <sub>3</sub> OD. .... | 32 |
| Table S8. <sup>1</sup> H (400 MHz) and <sup>13</sup> C (100 MHz) NMR of <b>6-8</b> in CD <sub>3</sub> OD .....                                       | 32 |

**Figure S1**  $^1\text{H}$  NMR spectrum of compound **1** in  $\text{CD}_3\text{OD}$

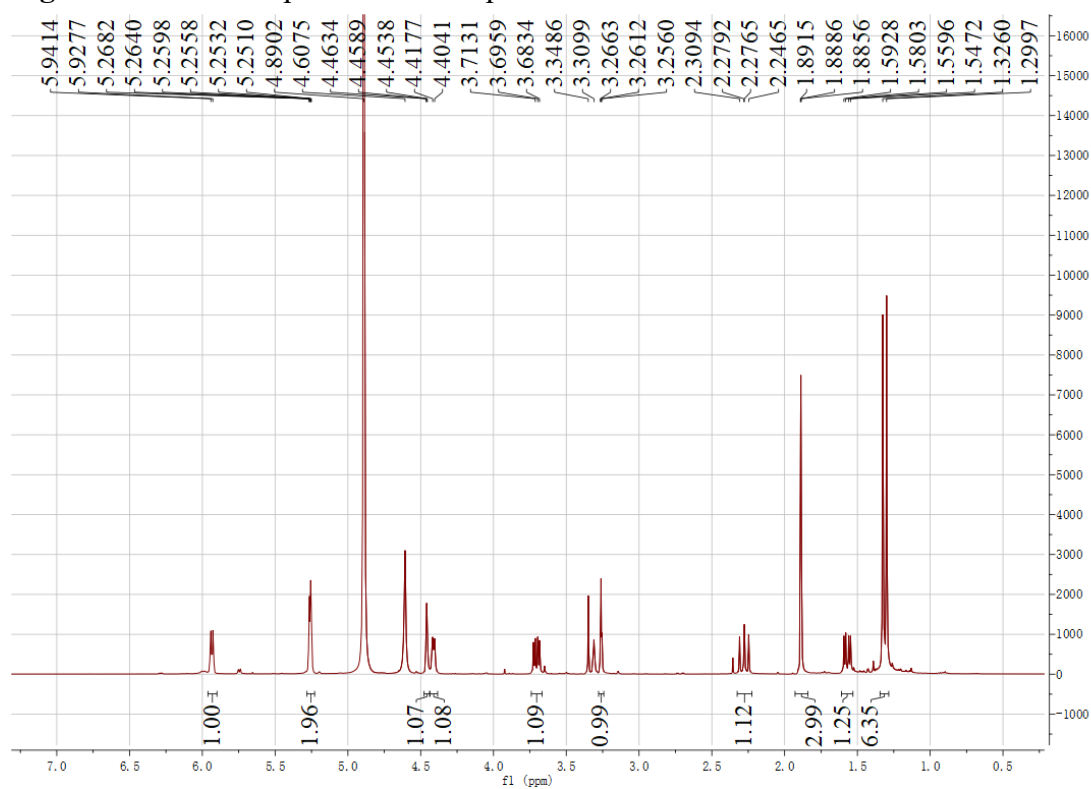

**Figure S2**  $^{13}\text{C}$  NMR spectrum of compound **1** in  $\text{CD}_3\text{OD}$

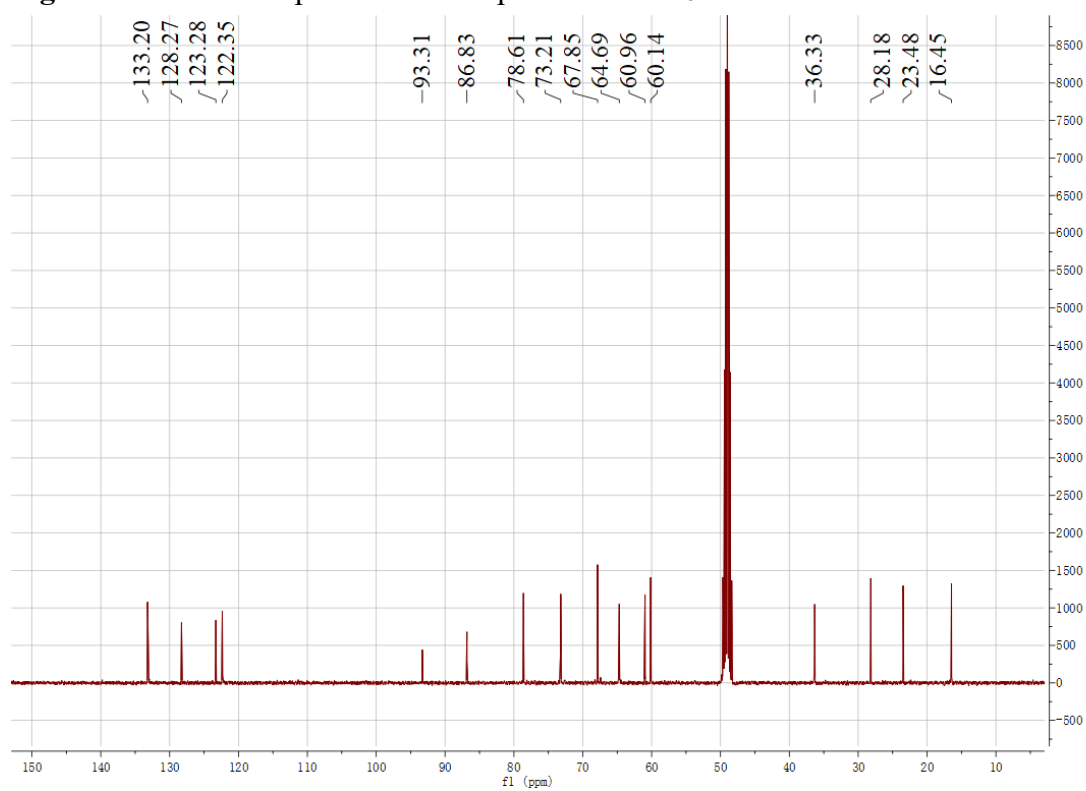

**Figure S3**  $^1\text{H}$ - $^1\text{H}$  COSY spectrum of compound **1** in  $\text{CD}_3\text{OD}$

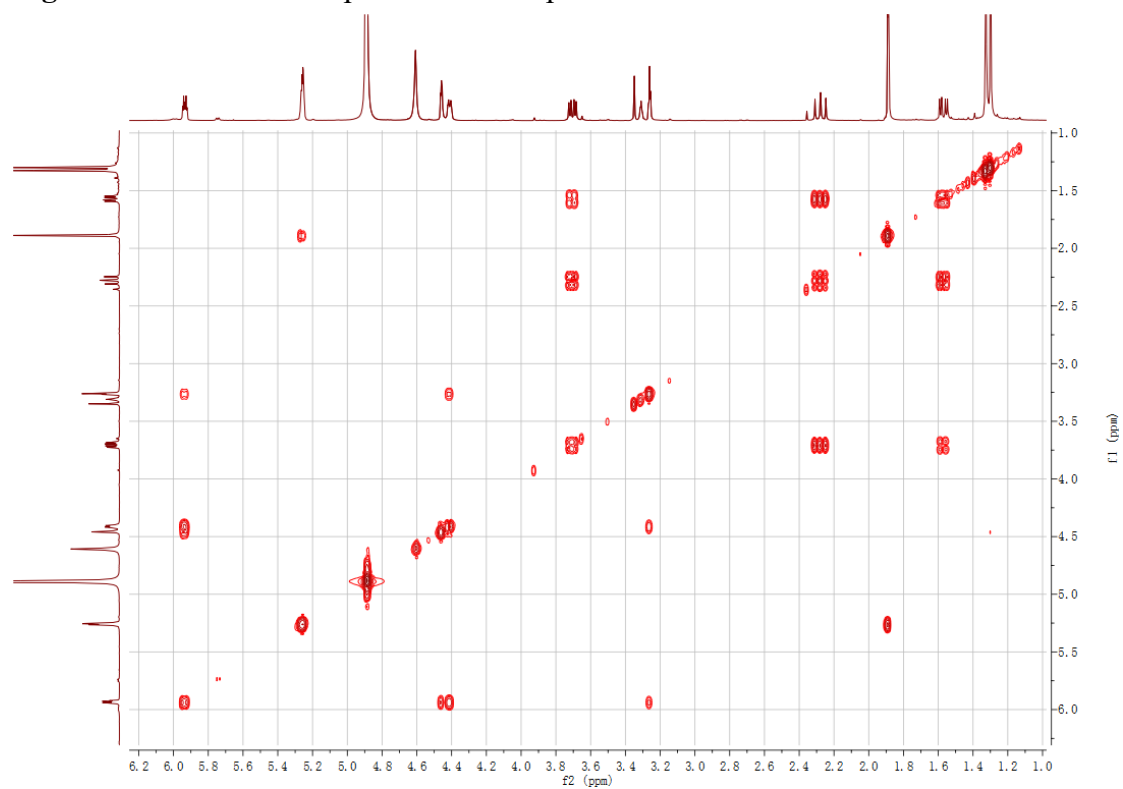

**Figure S4** HSQC spectrum of compound **1** in  $\text{CD}_3\text{OD}$

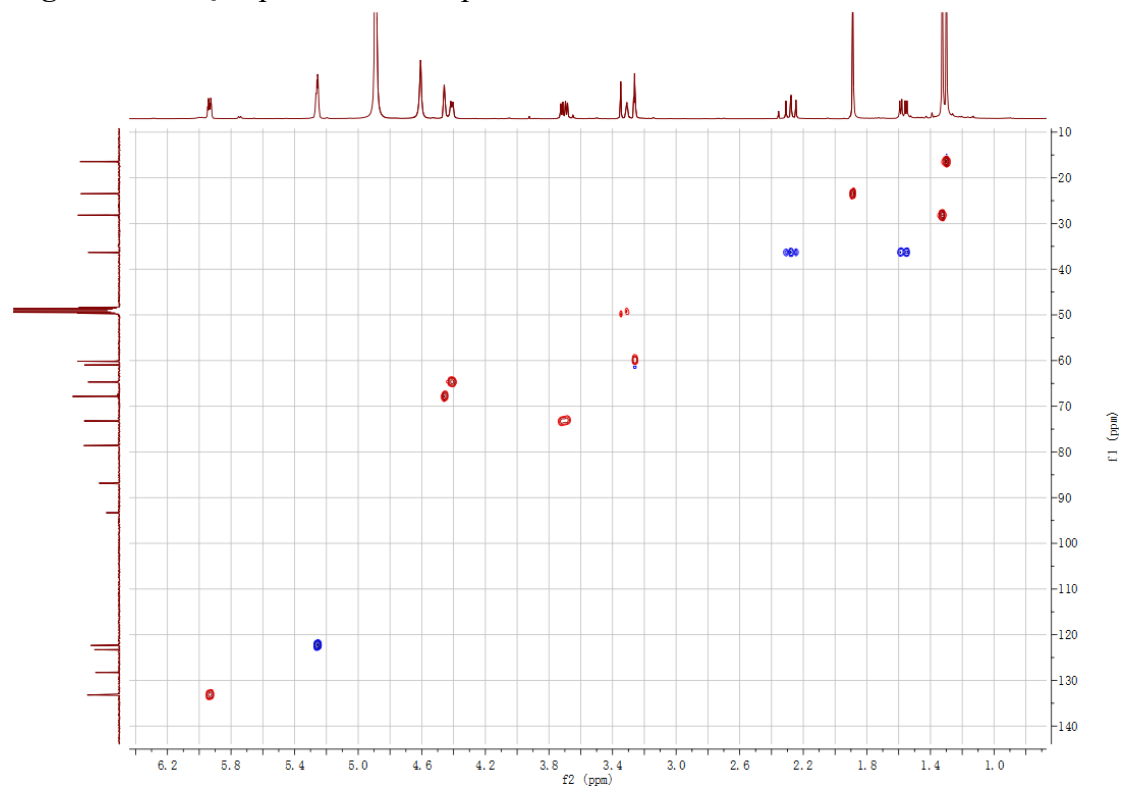

**Figure S5** HMBC spectrum of compound **1** in CD<sub>3</sub>OD

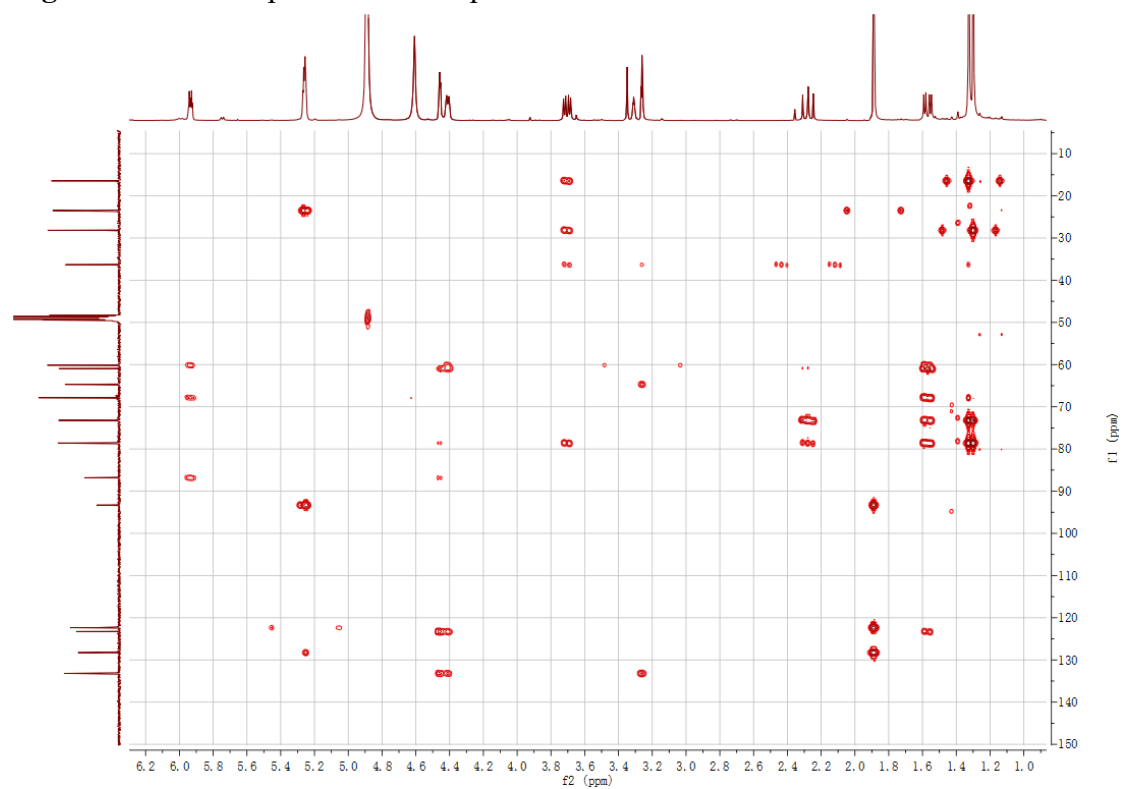

**Figure S6** NOESY spectrum of compound **1** in CD<sub>3</sub>OD

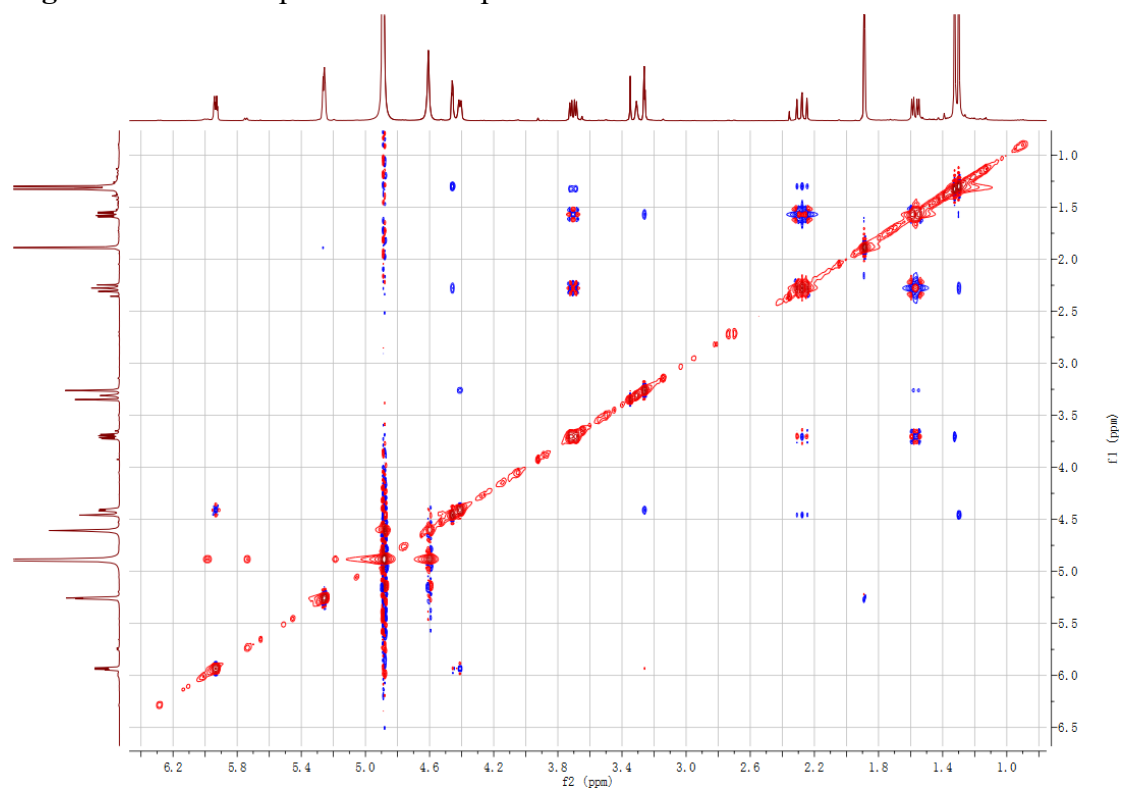

**Figure S7** HR-ESI-MS spectrum of compound **1**

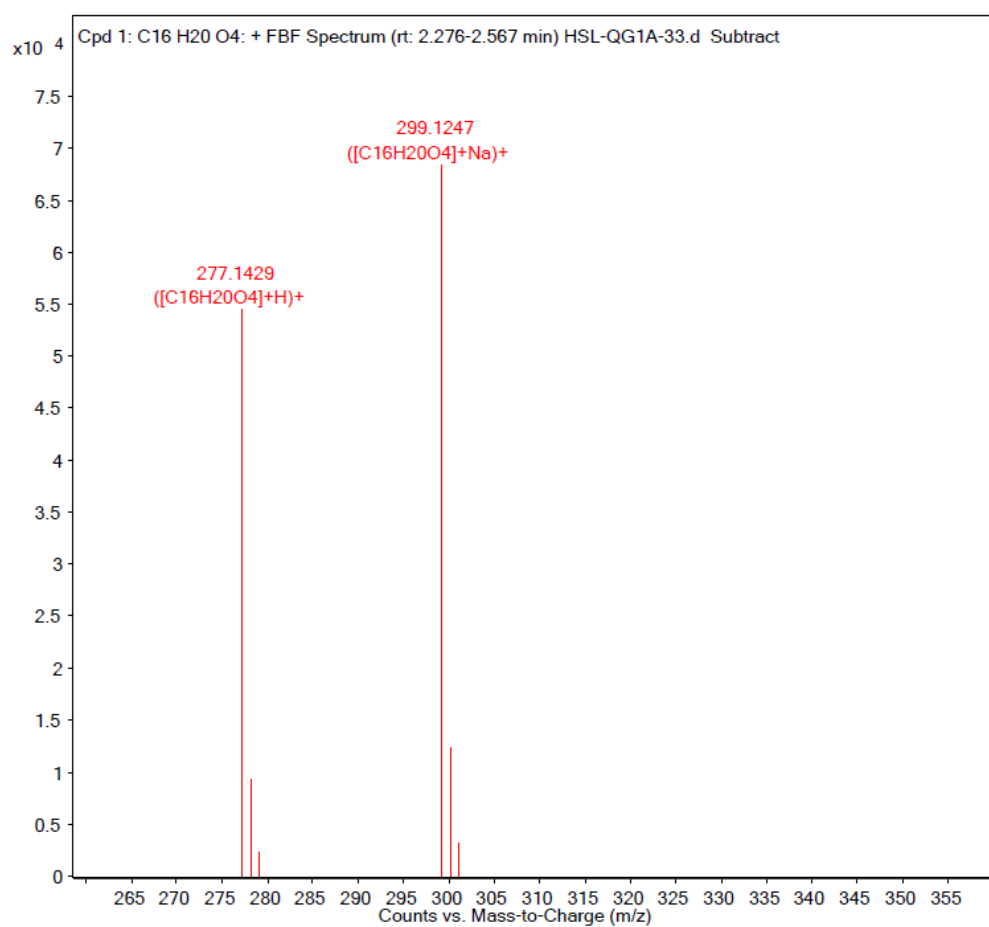

**Figure S8** UV spectrum of compound **1**

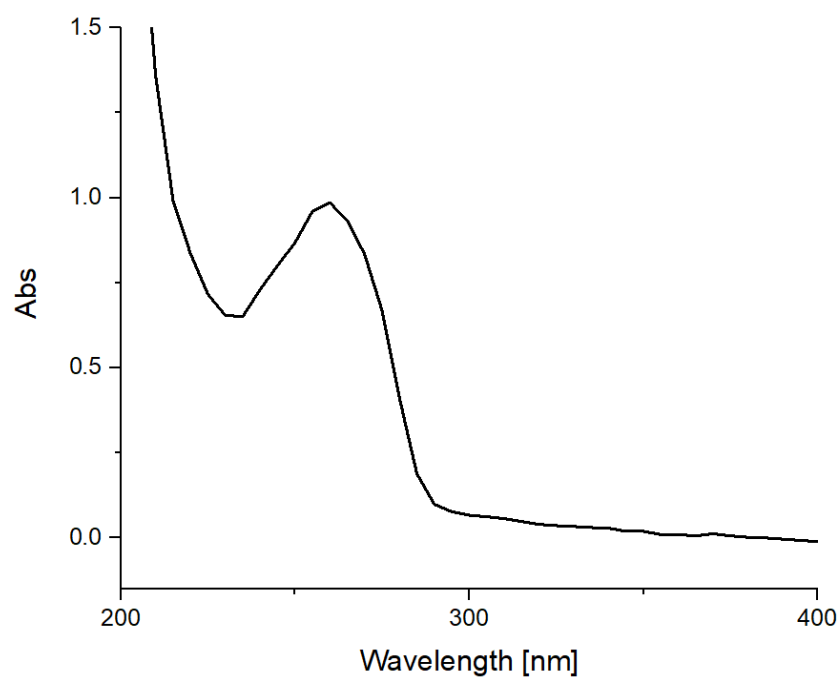

**Figure S9** IR spectrum of compound **1**

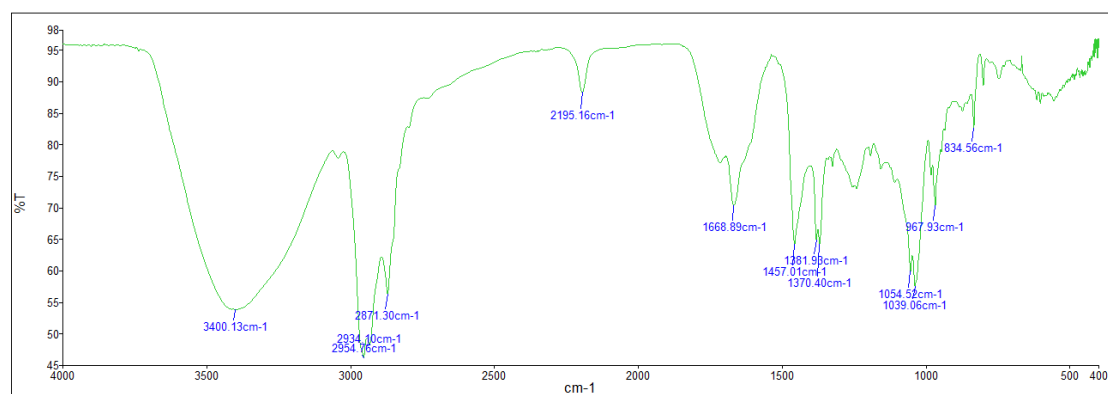

**Figure S10** <sup>1</sup>H NMR spectrum of compound **2** in CD<sub>3</sub>OD

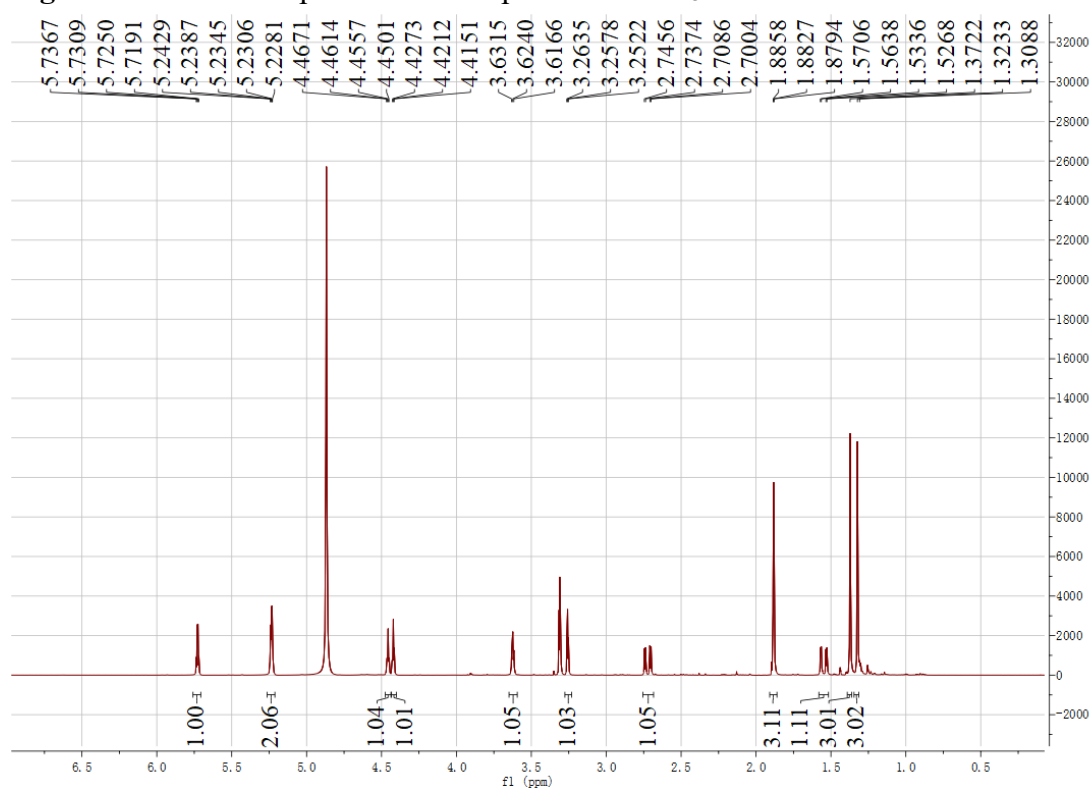



**Figure S11**  $^{13}\text{C}$  NMR spectrum of compound **2** in  $\text{CD}_3\text{OD}$

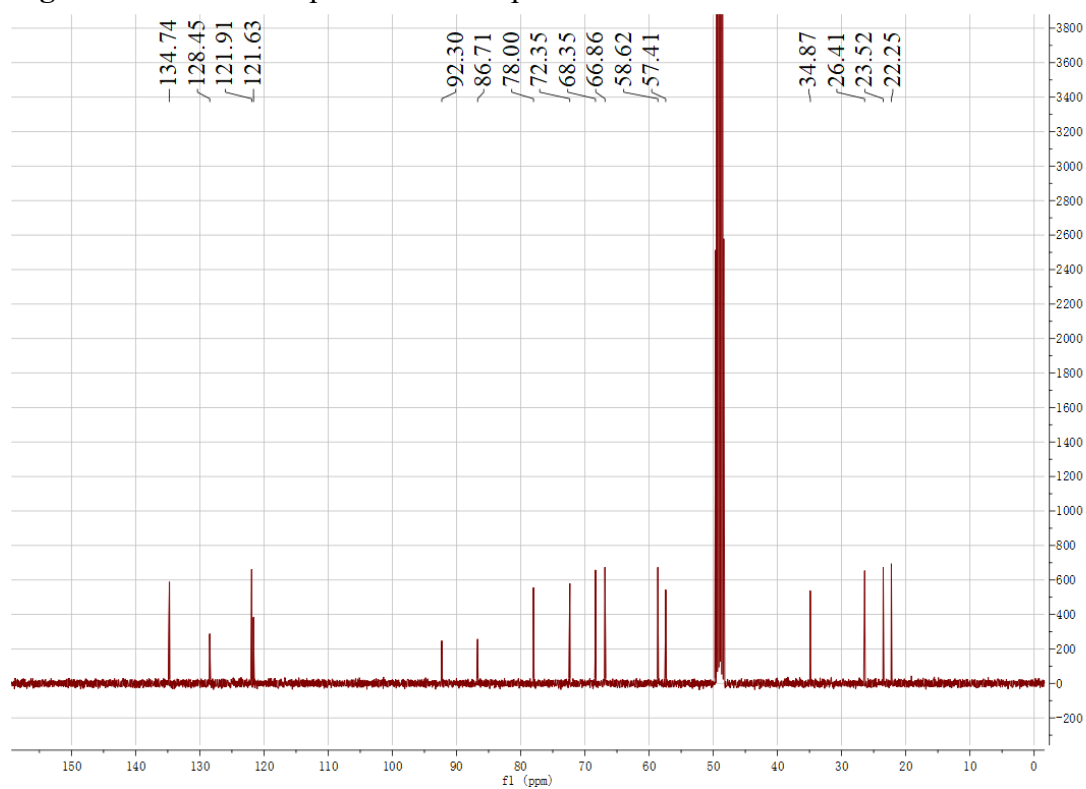

**Figure S12**  $^1\text{H}$ - $^1\text{H}$  COSY spectrum of compound **2** in  $\text{CD}_3\text{OD}$

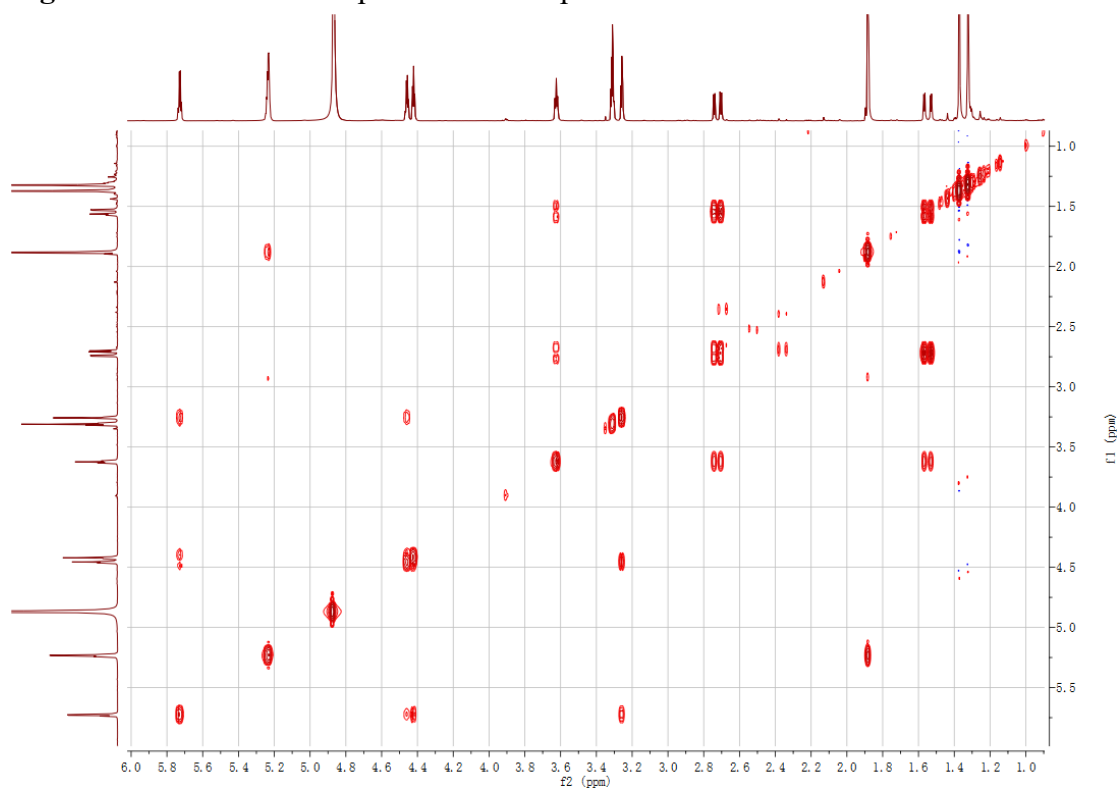

**Figure S13** HSQC spectrum of compound **2** in CD<sub>3</sub>OD

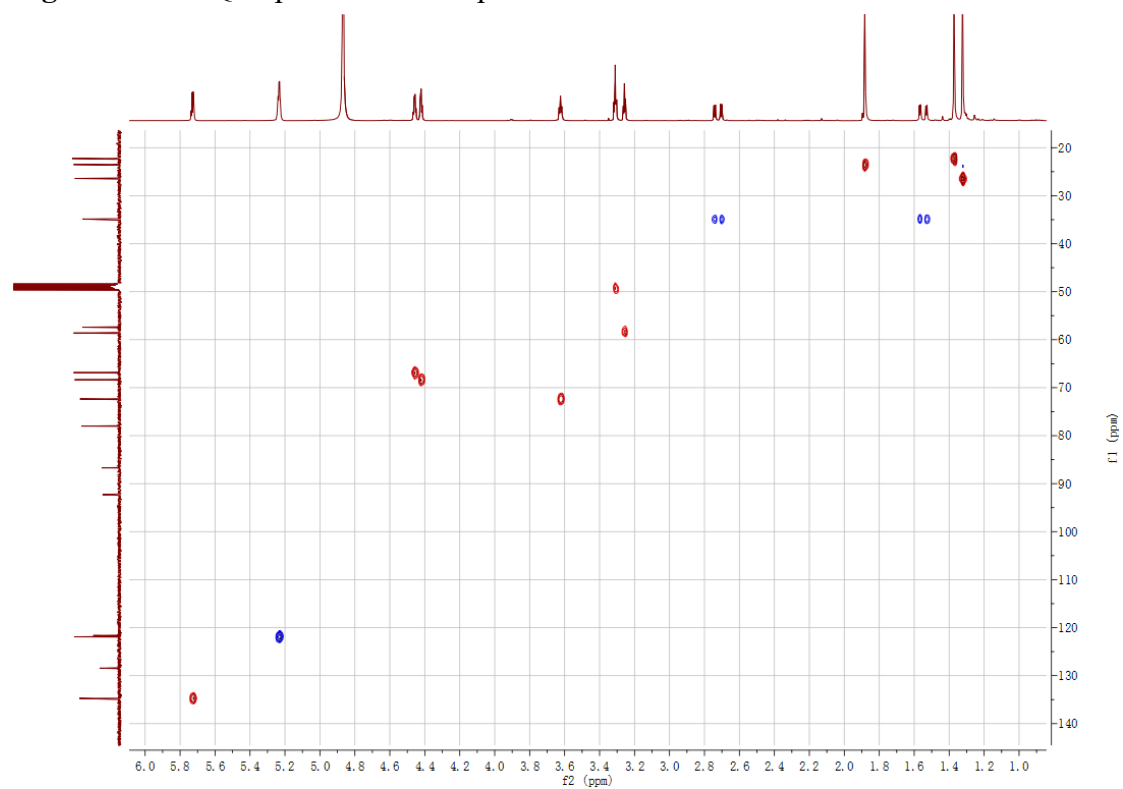

**Figure S14** HMBC spectrum of compound **2** in CD<sub>3</sub>OD

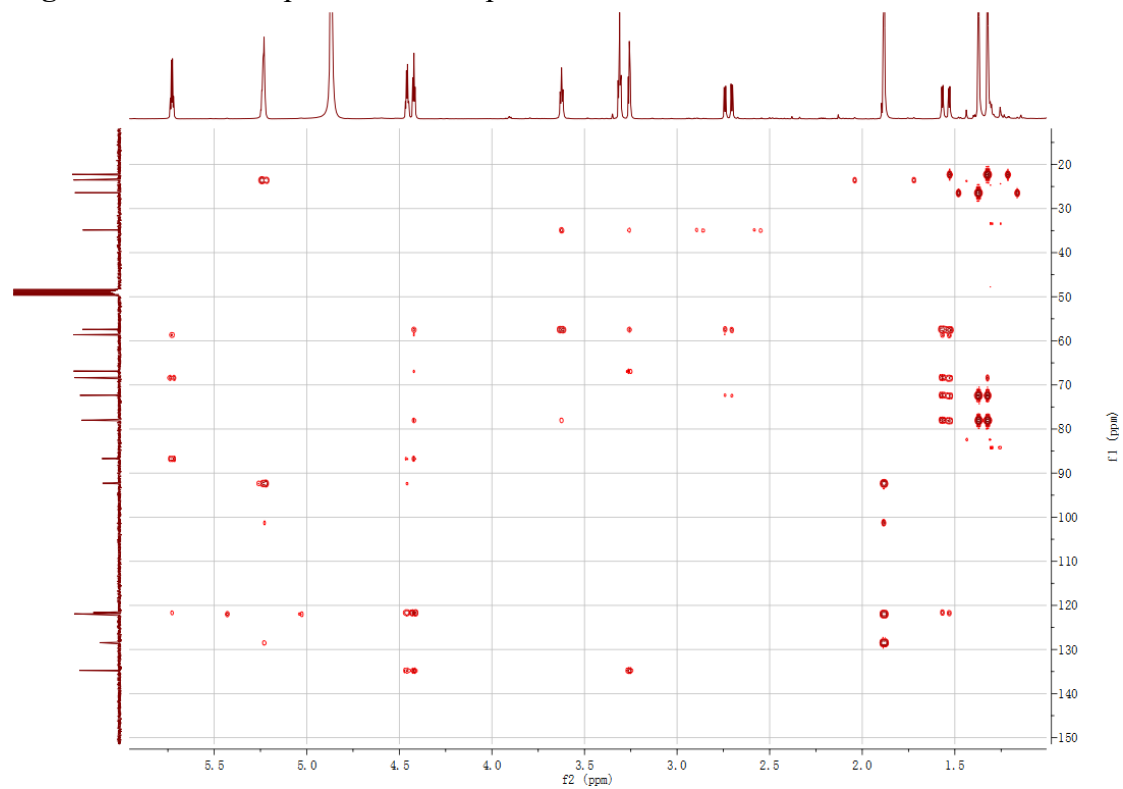

**Figure S15** NOESY spectrum of compound **2** in CD<sub>3</sub>OD

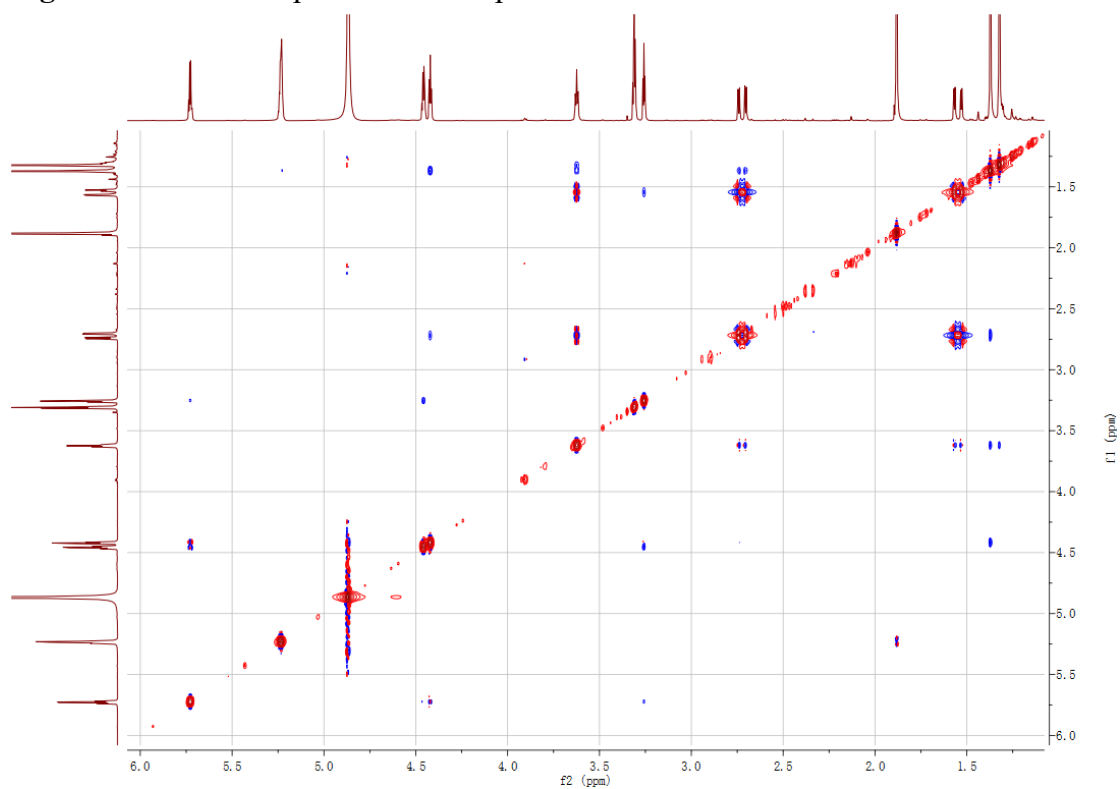

**Figure S16** HR-ESI-MS spectrum of compound **2**

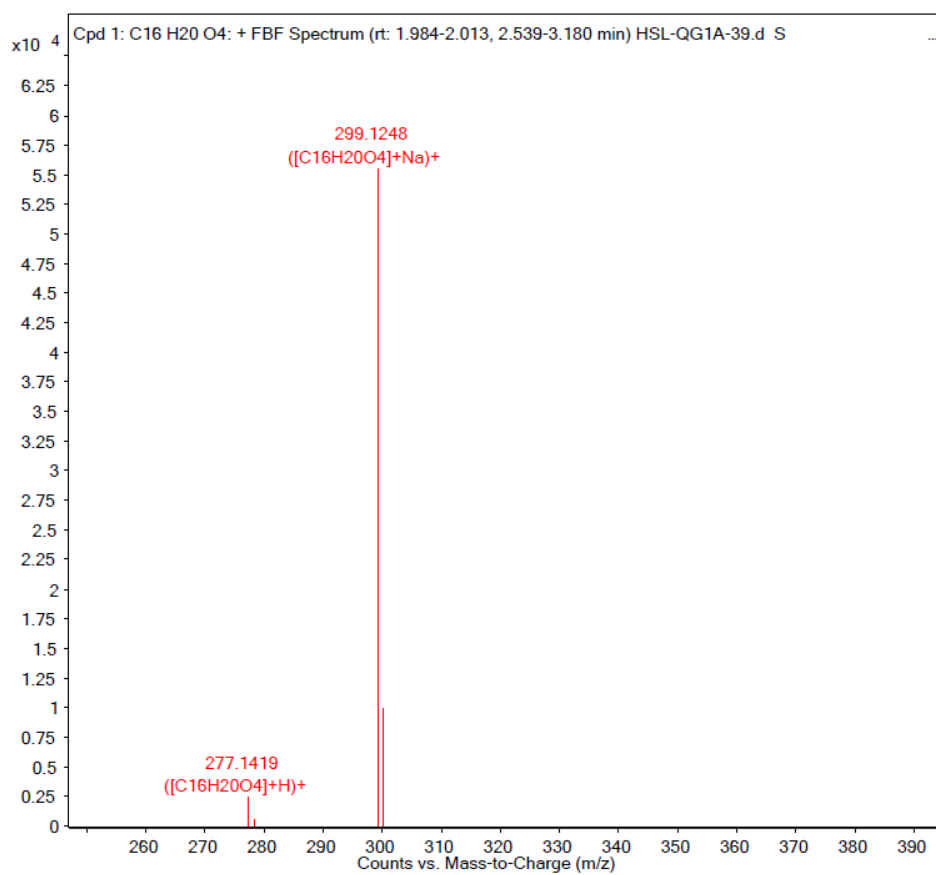

**Figure S17** UV spectrum of compound **2**

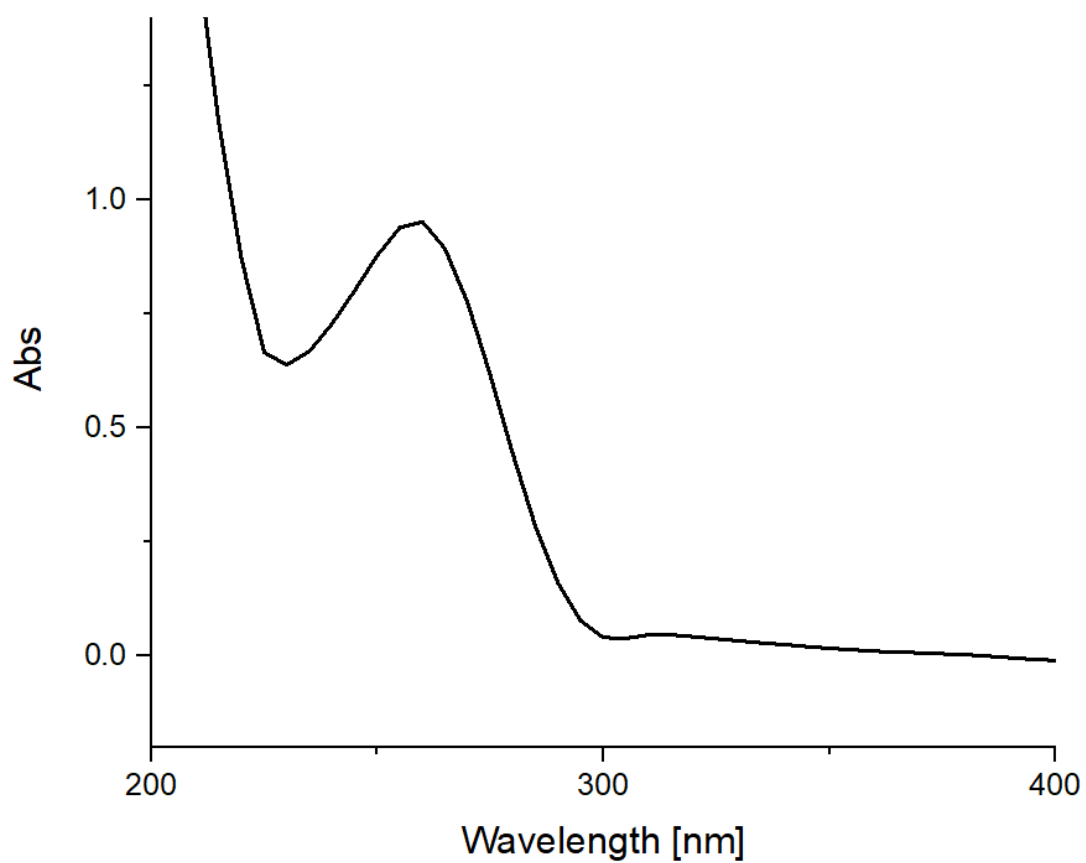

**Figure S18** IR spectrum of compound **2**

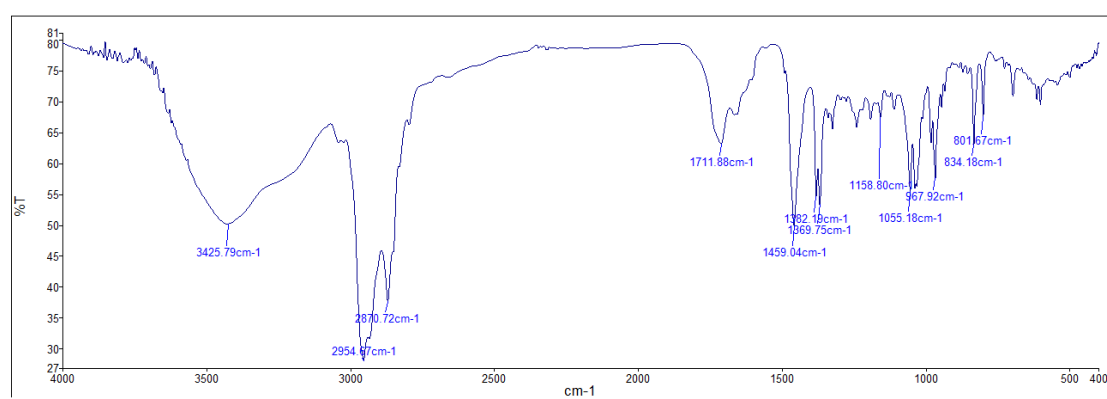

**Figure S19**  $^1\text{H}$  NMR spectrum of compound **3** in  $\text{CD}_3\text{OD}$

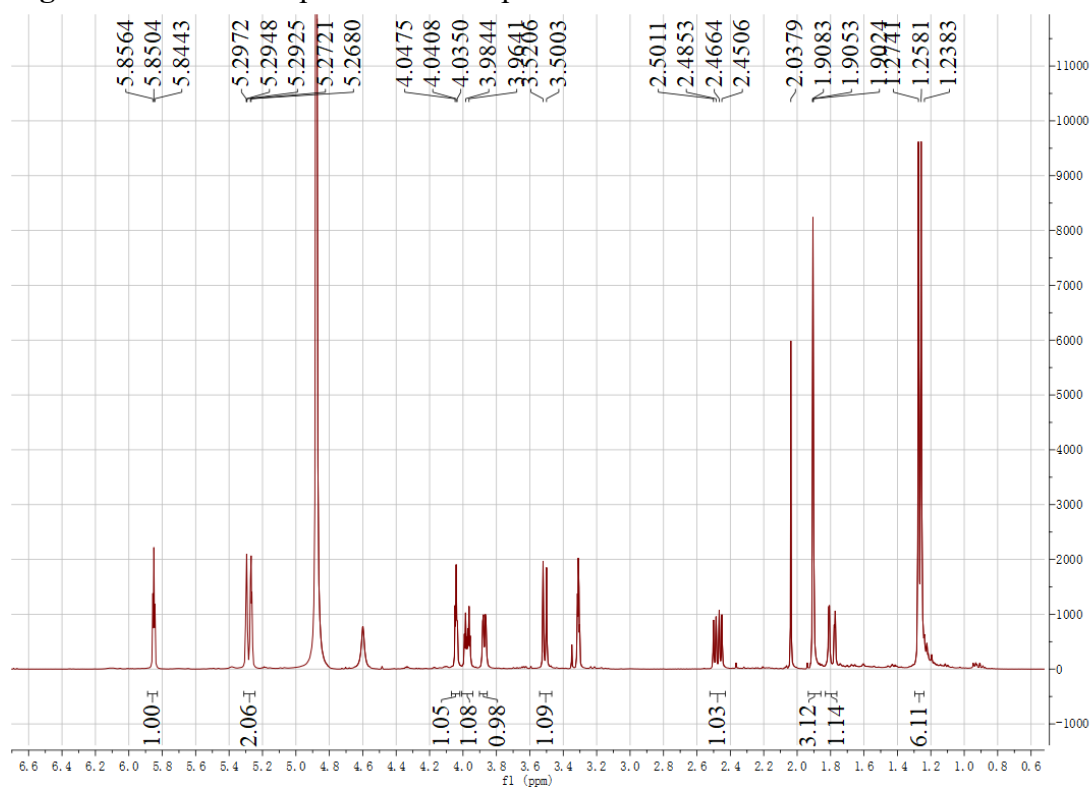

**Figure S20**  $^{13}\text{C}$  NMR spectrum of compound **3** in  $\text{CD}_3\text{OD}$

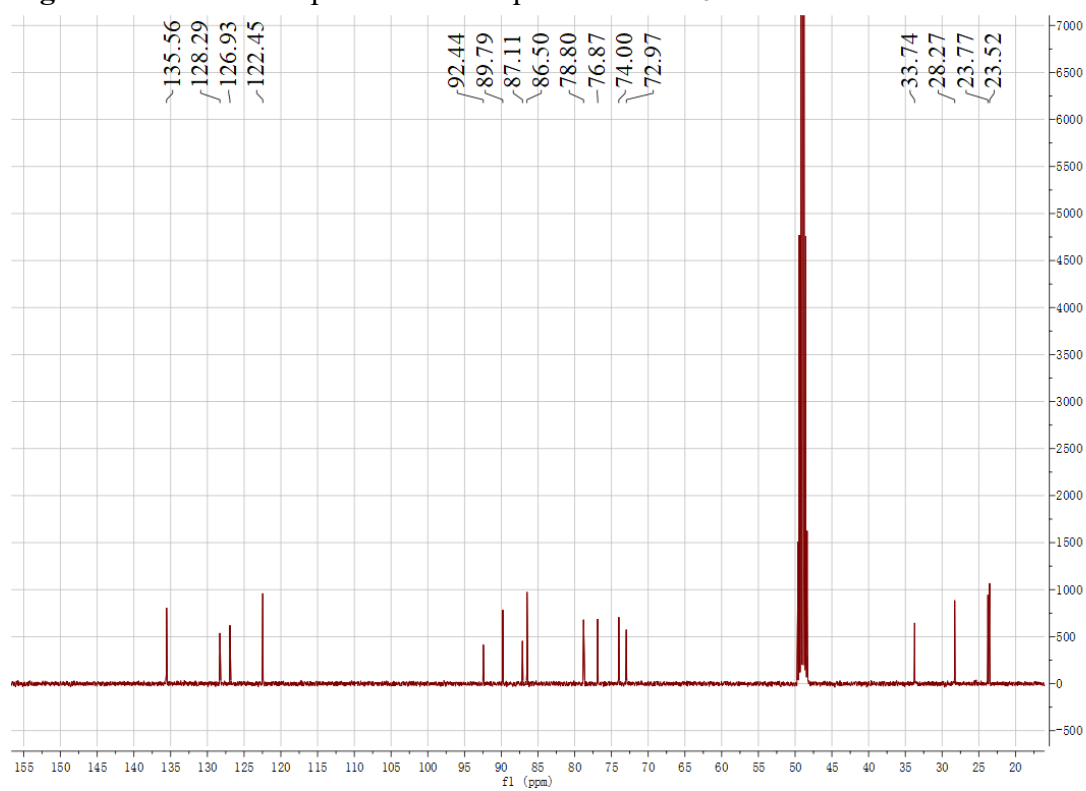

**Figure S21**  $^1\text{H}$ - $^1\text{H}$  COSY spectrum of compound **3** in  $\text{CD}_3\text{OD}$

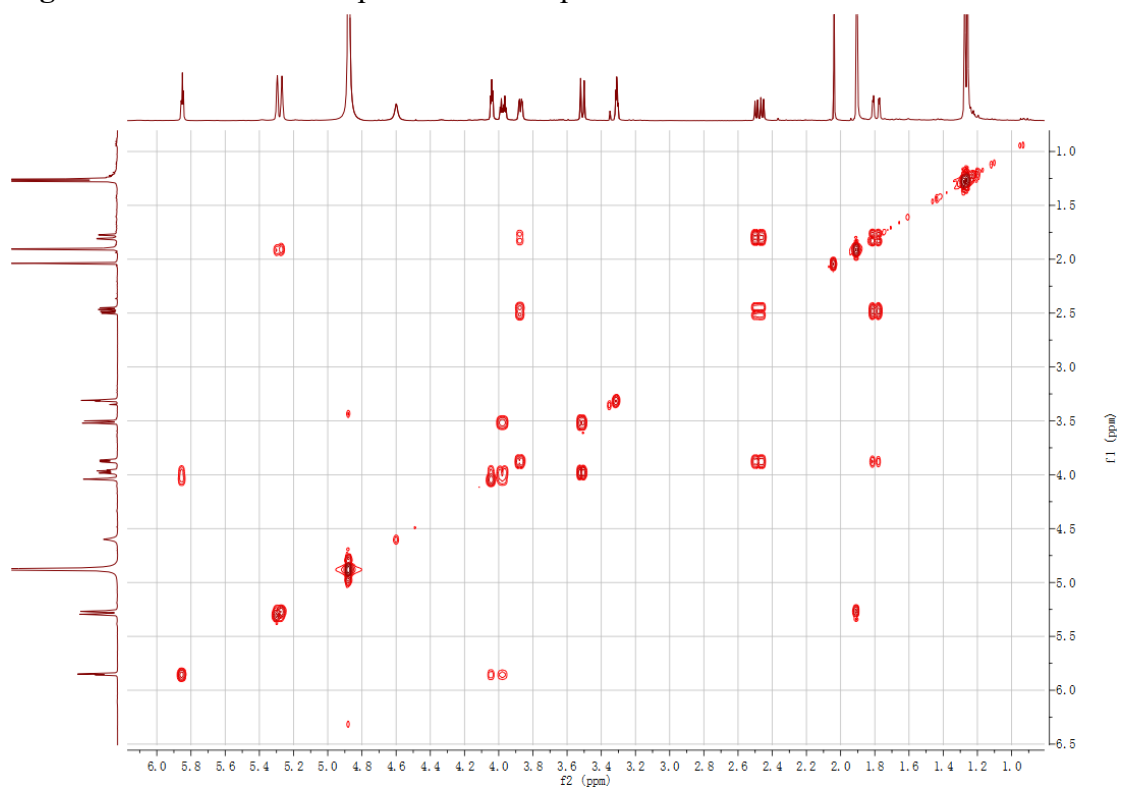

**Figure S22** HSQC spectrum of compound **3** in  $\text{CD}_3\text{OD}$

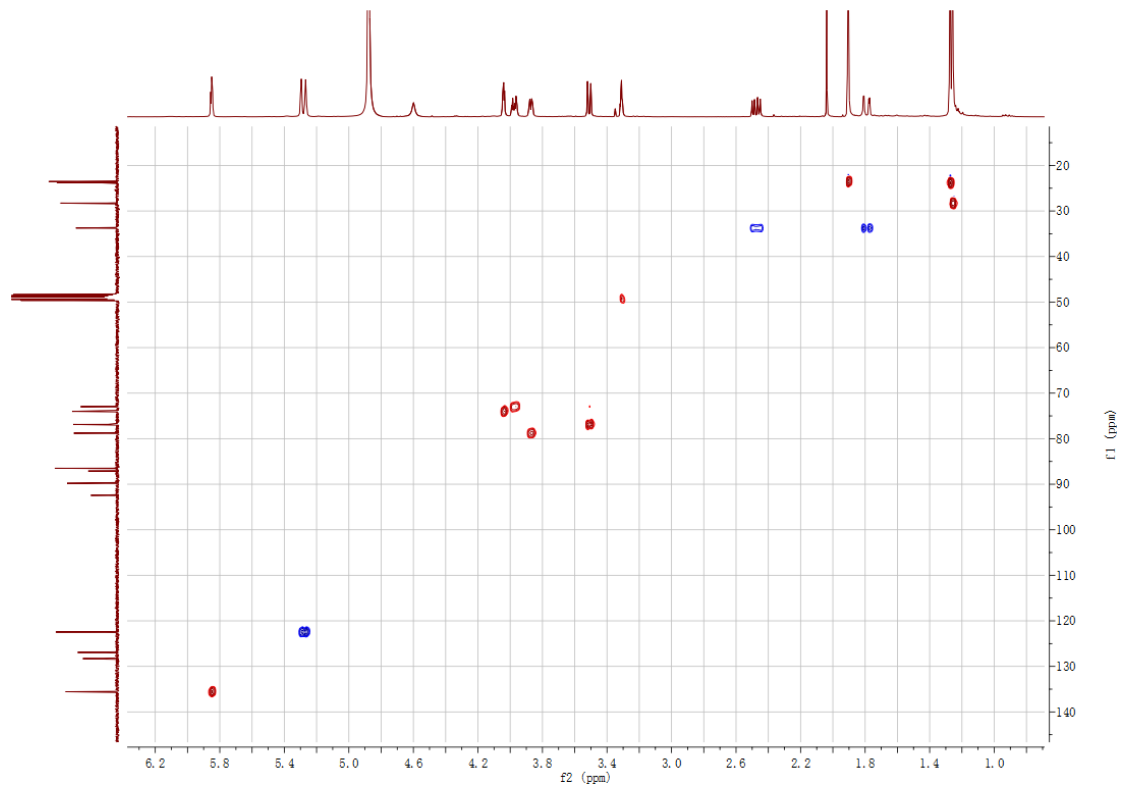

**Figure S23** HMBC spectrum of compound **3** in CD<sub>3</sub>OD

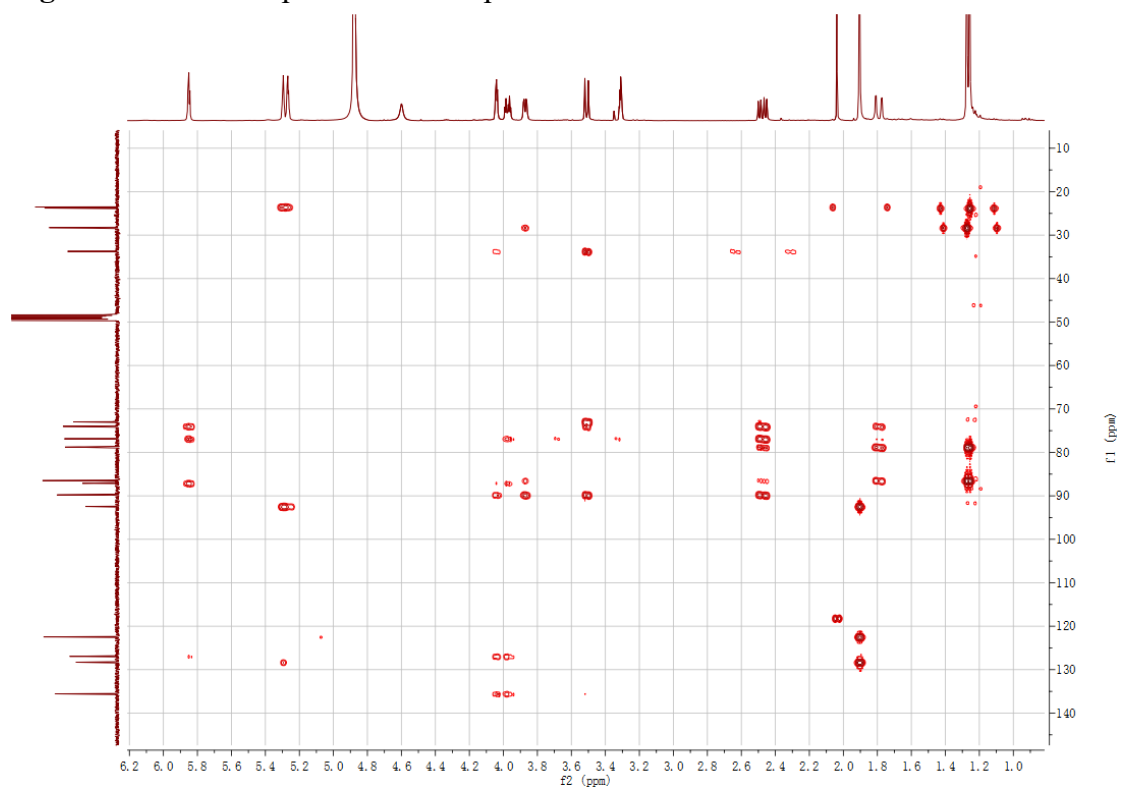

**Figure S24** NOESY spectrum of compound **3** in CD<sub>3</sub>OD

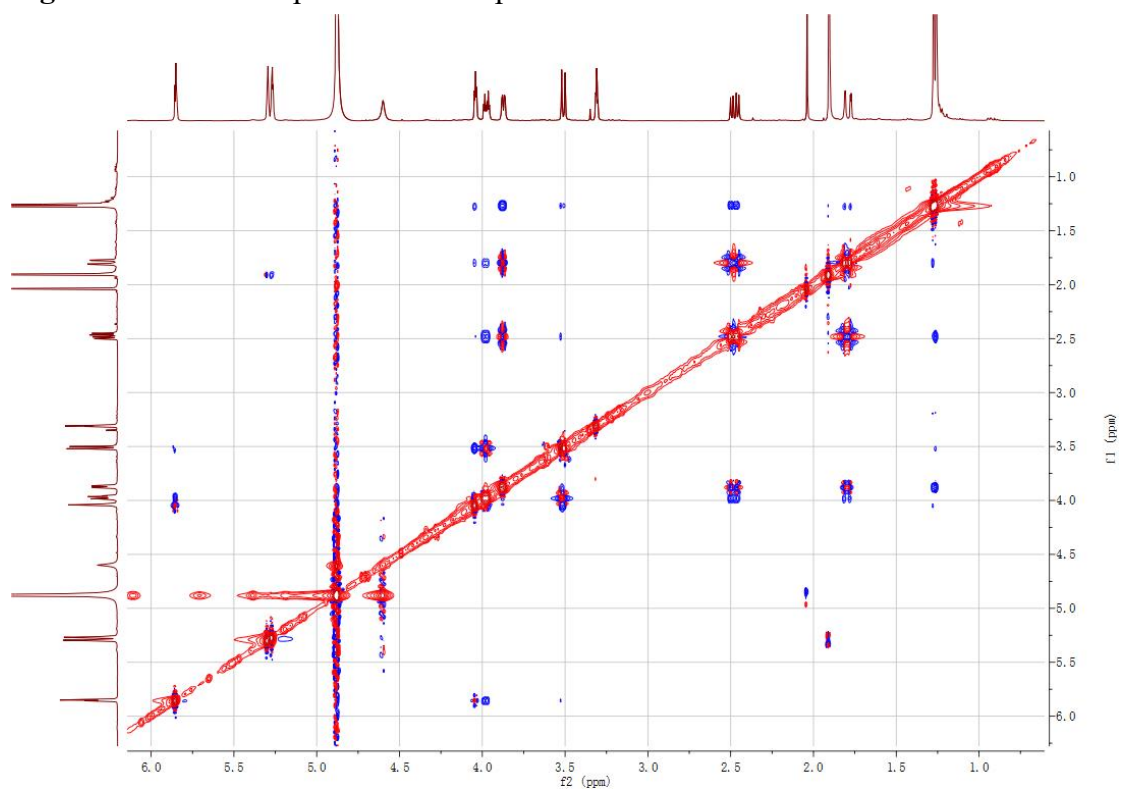

**Figure S25** HR-ESI-MS spectrum of compound **3**

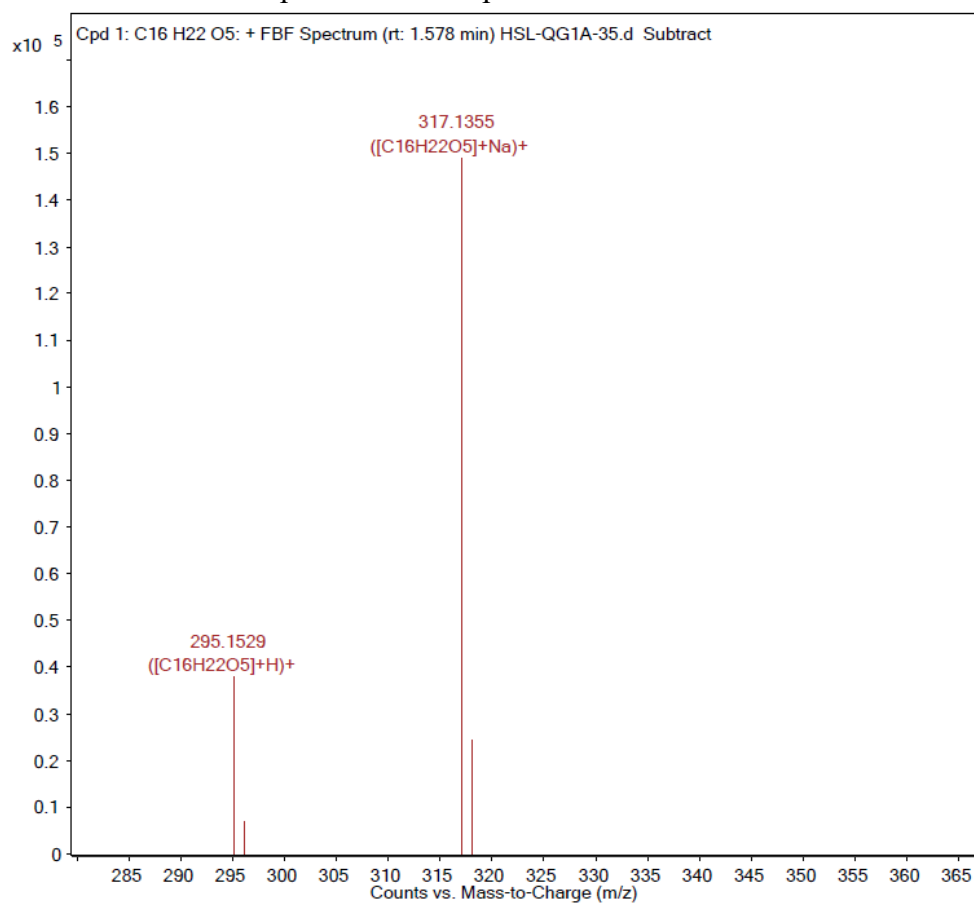

**Figure S26** UV spectrum of compound **3**

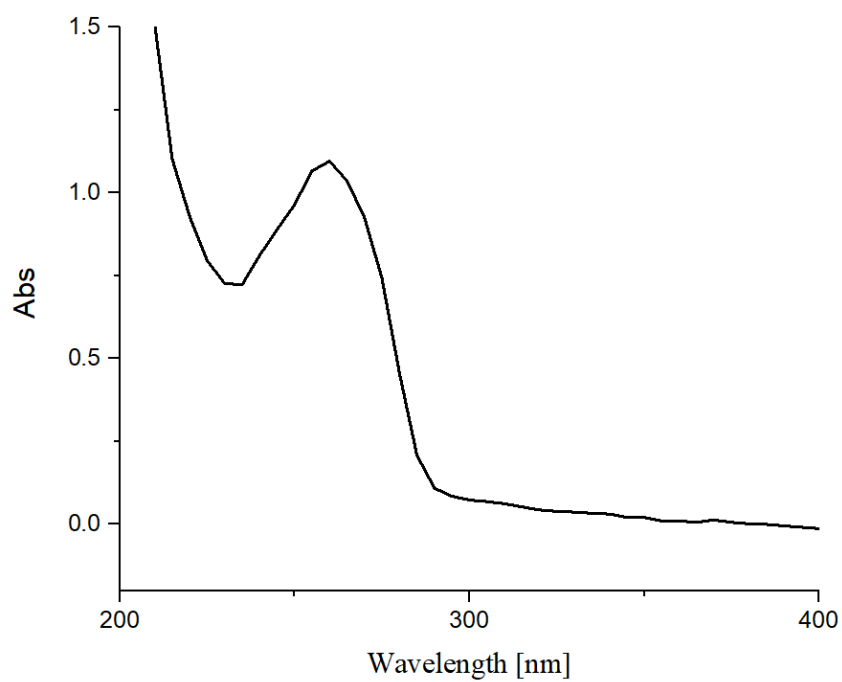



**Figure S27** IR spectrum of compound **3**

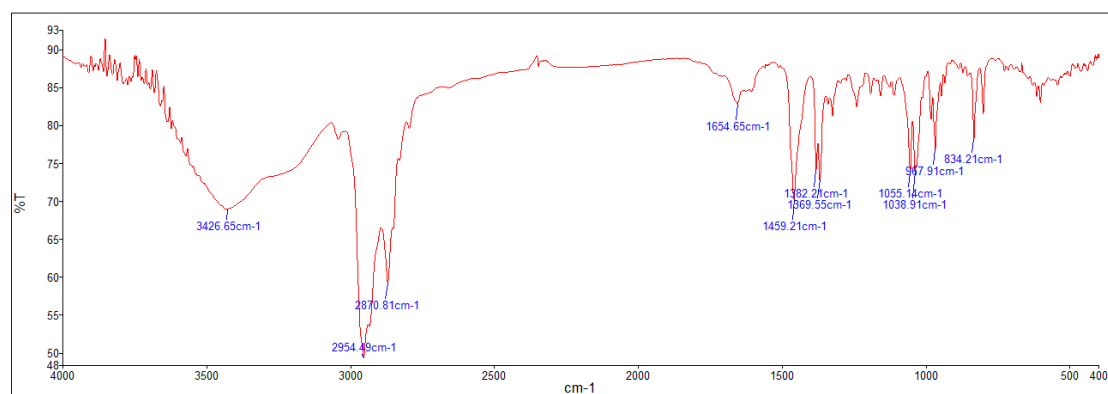

**Figure S28** <sup>1</sup>H NMR spectrum of compound **4** in CD<sub>3</sub>OD

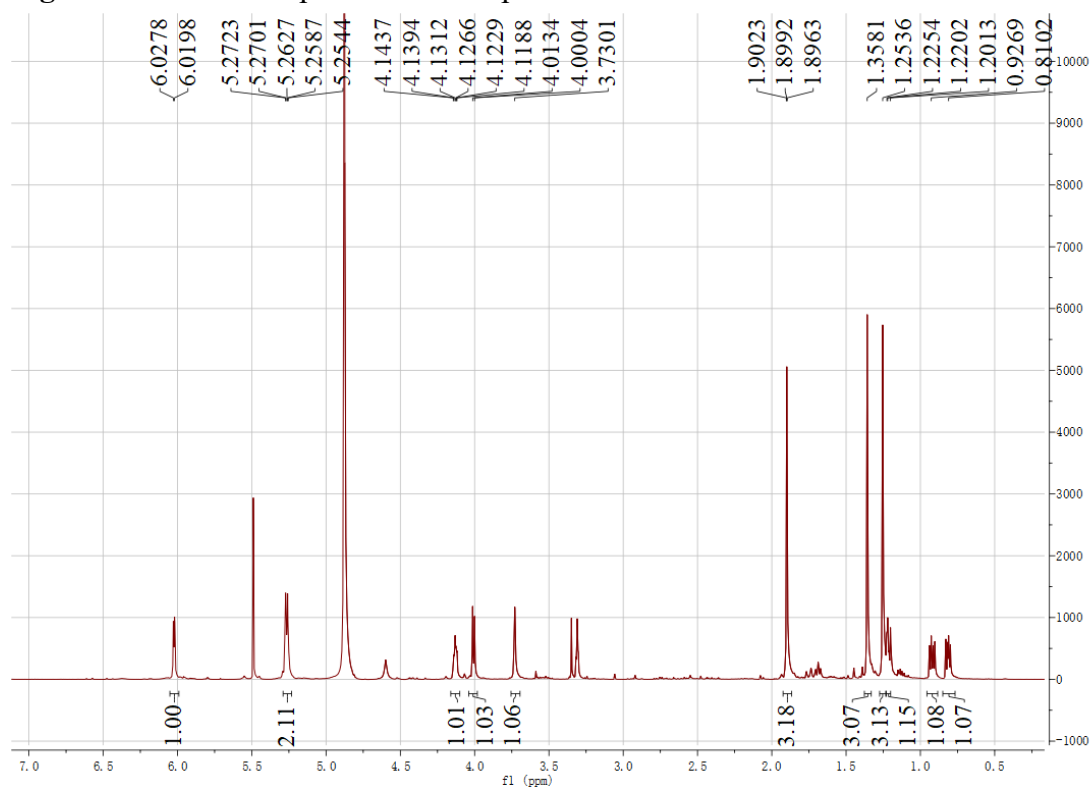

**Figure S29**  $^{13}\text{C}$  NMR spectrum of compound **4** in  $\text{CD}_3\text{OD}$

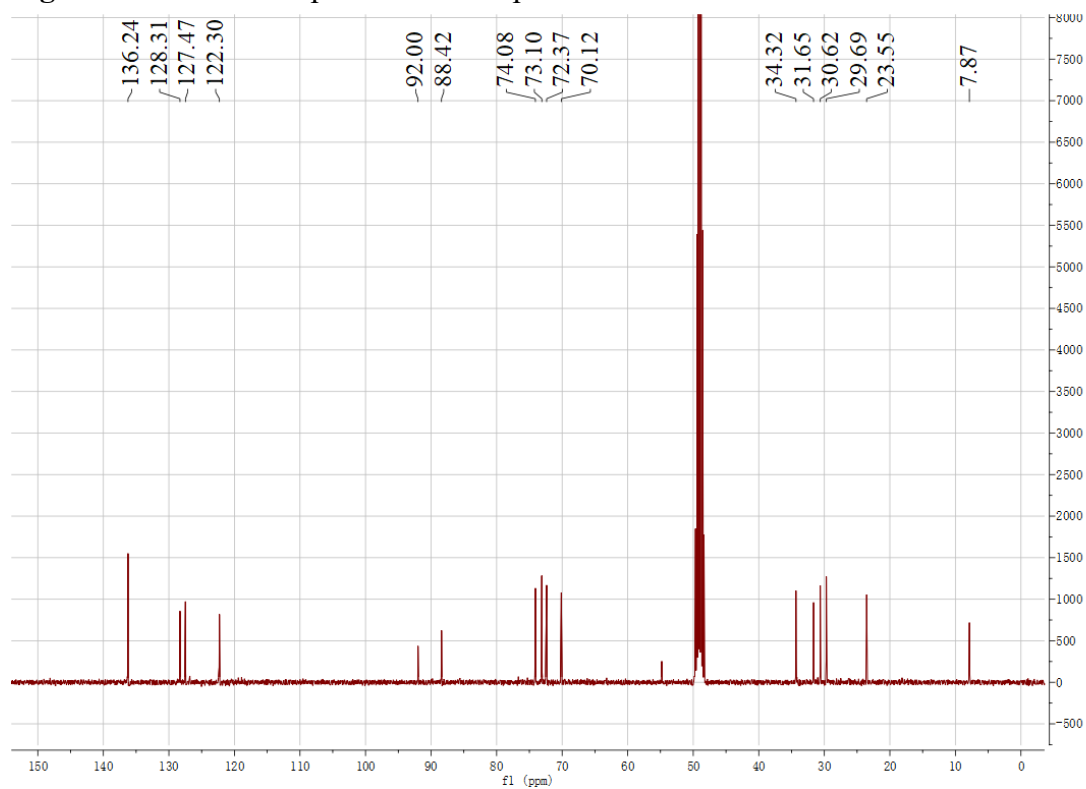

**Figure S30**  $^1\text{H}$ - $^1\text{H}$  COSY spectrum of compound **4** in  $\text{CD}_3\text{OD}$

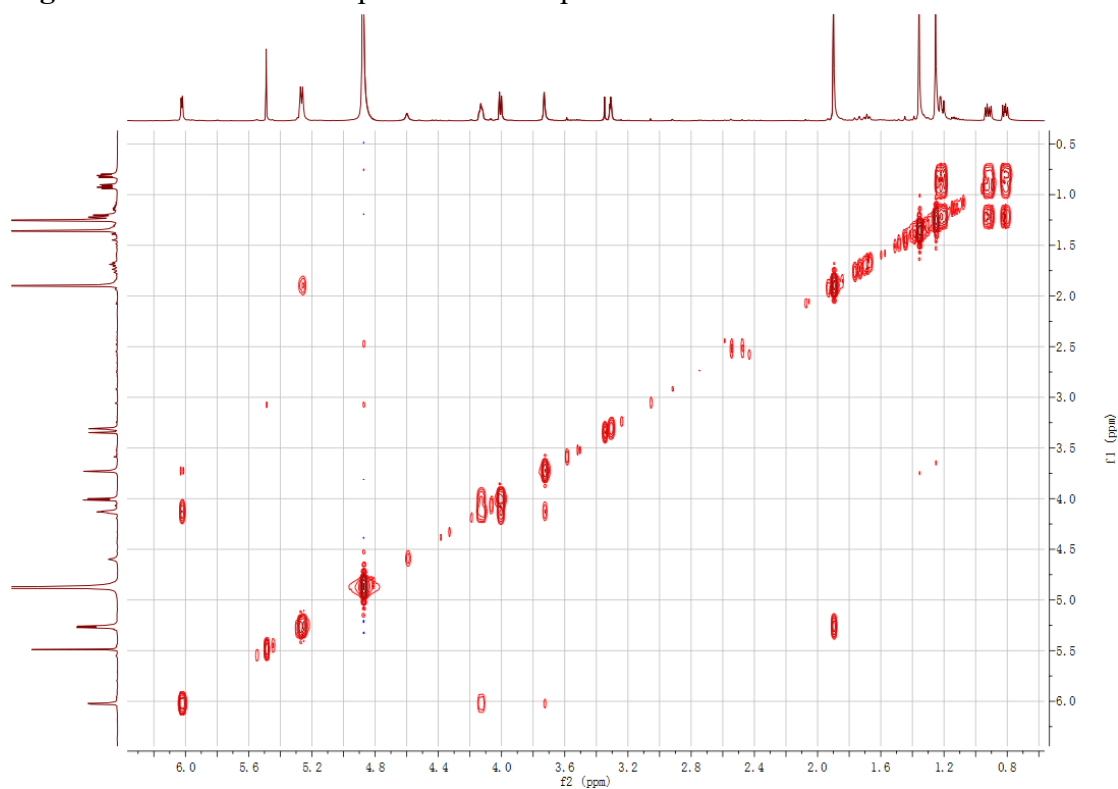

**Figure S31** HSQC spectrum of compound **4** in CD<sub>3</sub>OD

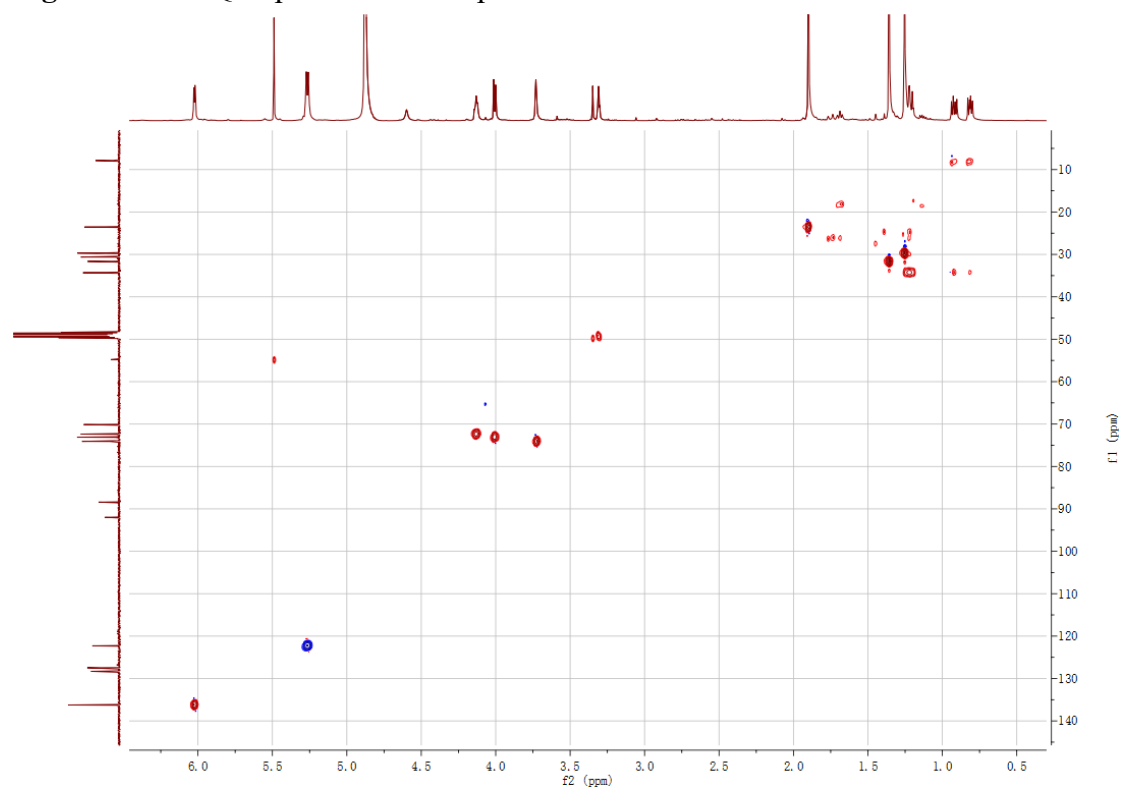

**Figure S32** HMBC spectrum of compound **4** in CD<sub>3</sub>OD

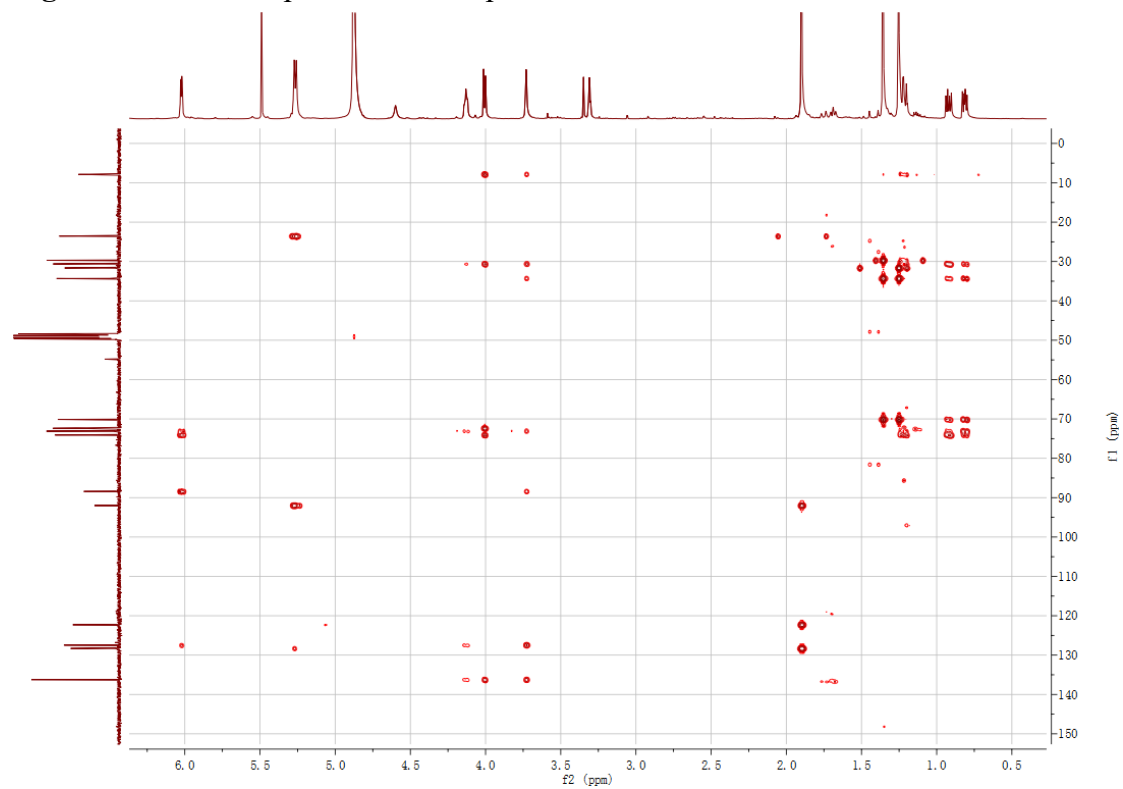

**Figure S33** NOESY spectrum of compound **4** in CD<sub>3</sub>OD

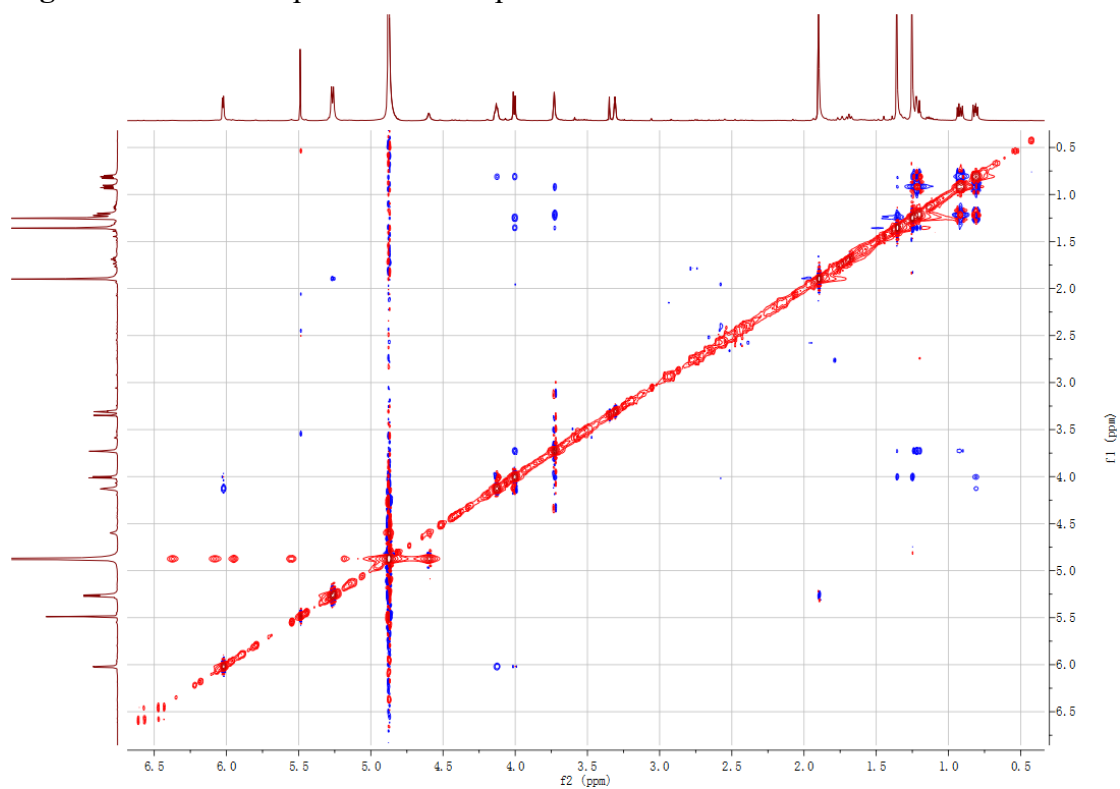

**Figure S34** HR-ESI-MS spectrum of compound **4**

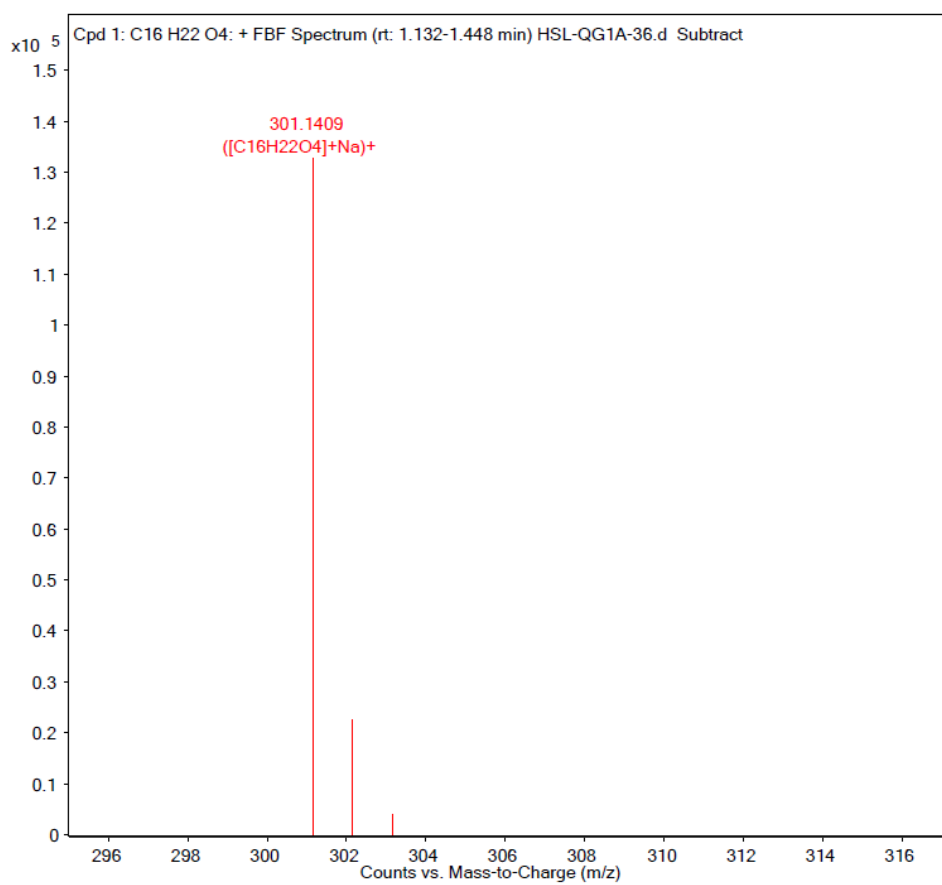

**Figure S35** UV spectrum of compound **4**

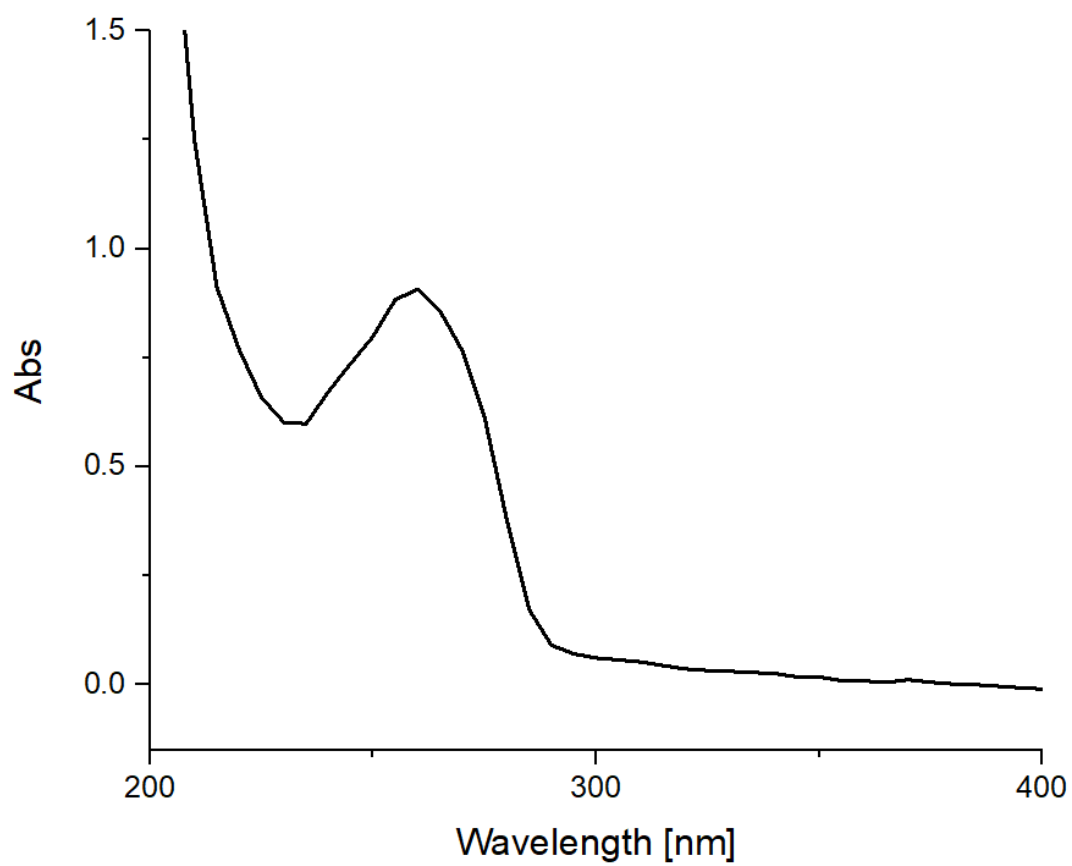

**Figure S36** IR spectrum of compound **4**

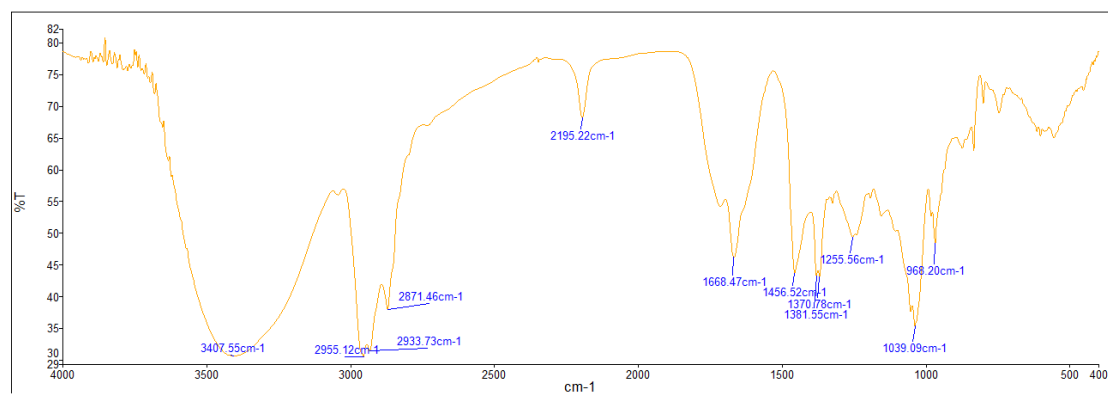

**Figure S37**  $^1\text{H}$  NMR spectrum of compound **5** in  $\text{CD}_3\text{OD}$

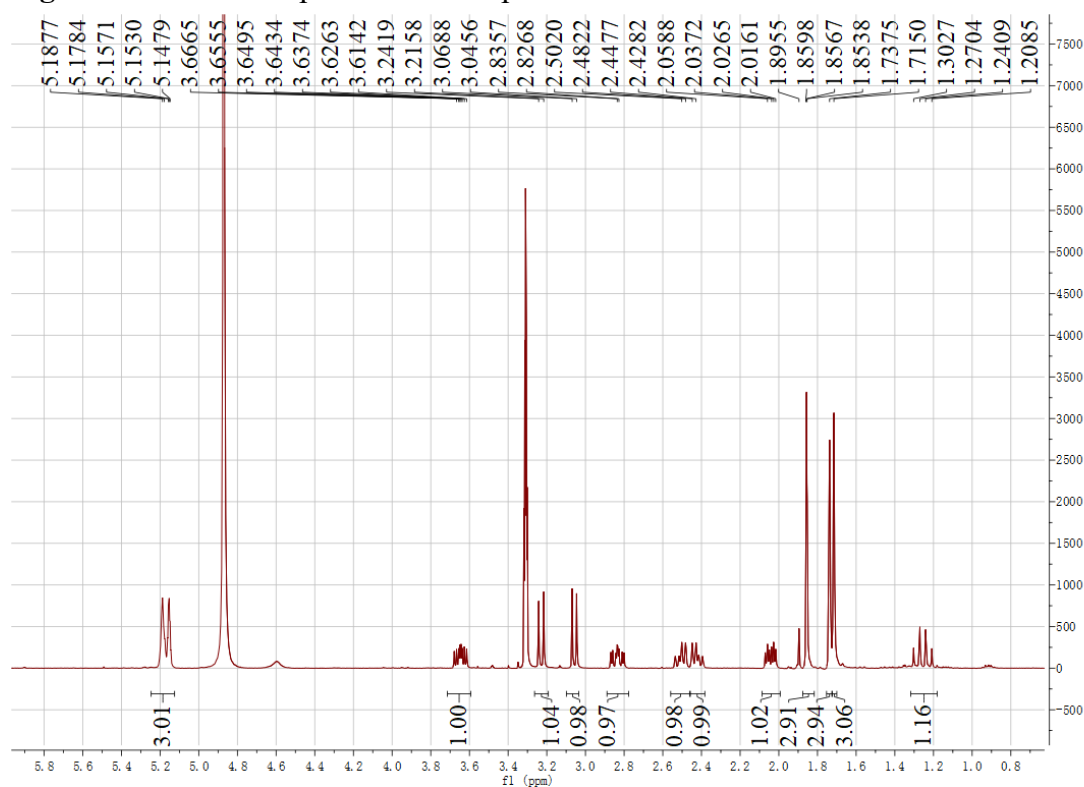

**Figure S38**  $^{13}\text{C}$  NMR spectrum of compound **5** in  $\text{CD}_3\text{OD}$

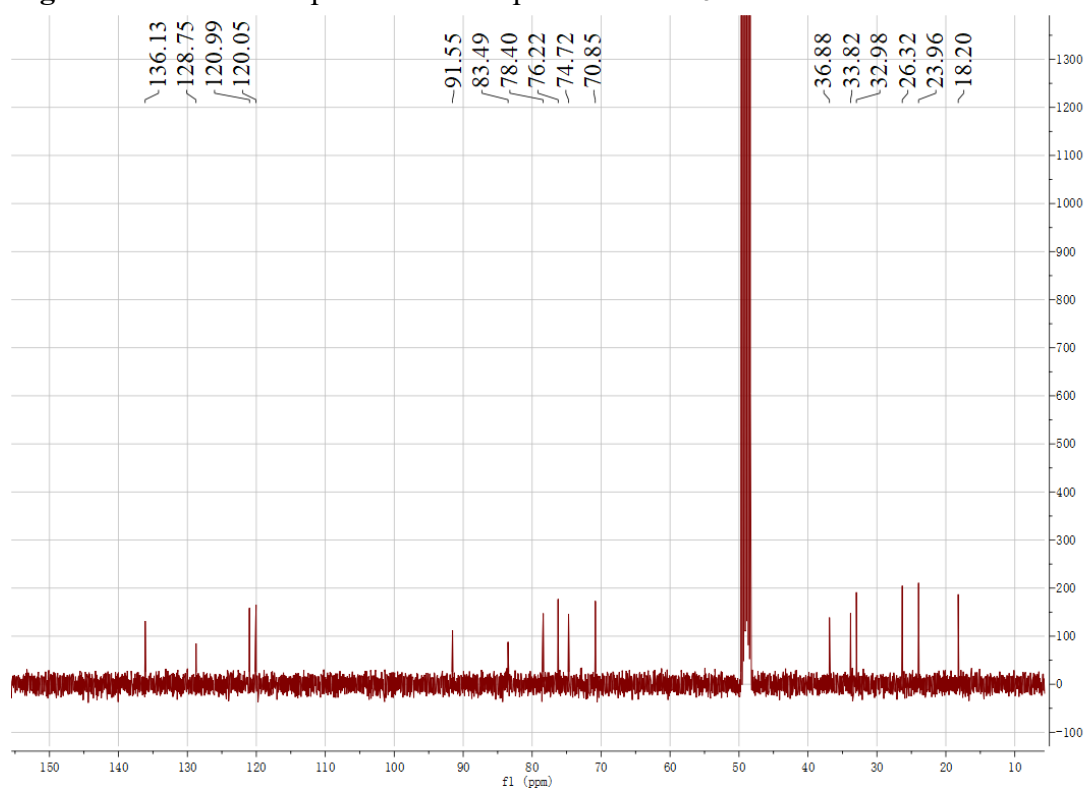

**Figure S39**  $^1\text{H}$ - $^1\text{H}$  COSY spectrum of compound **5** in  $\text{CD}_3\text{OD}$

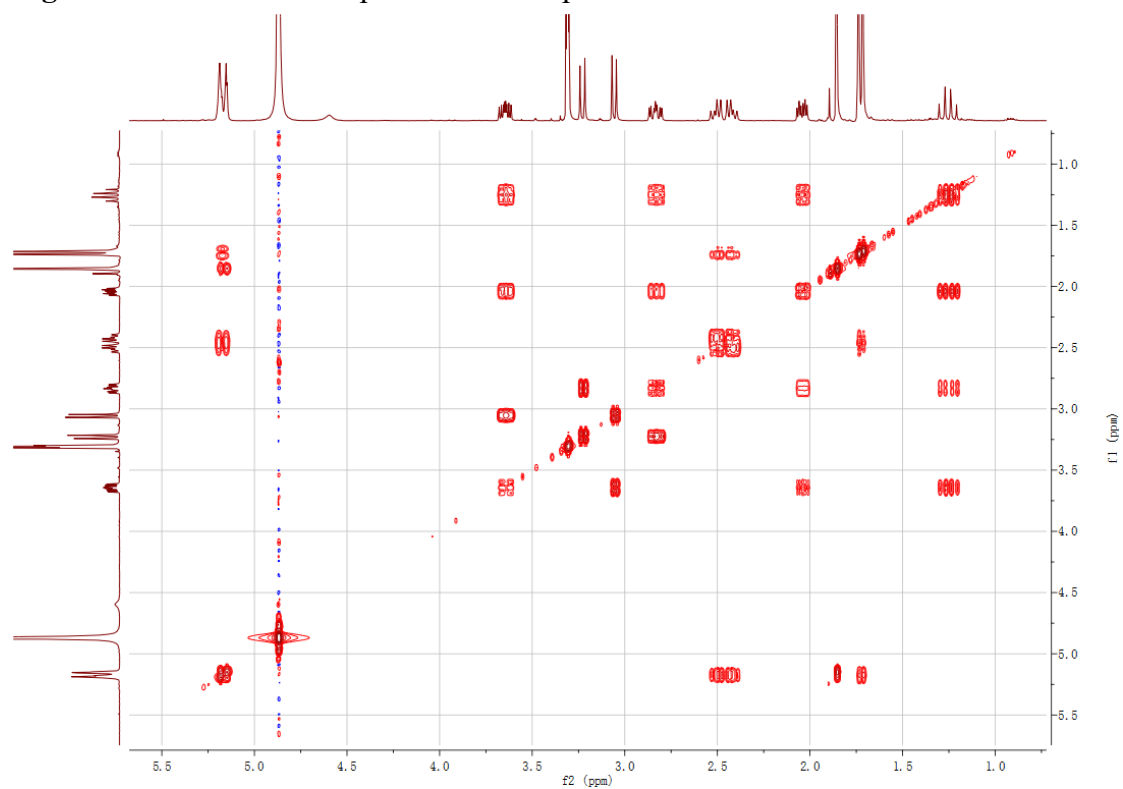

**Figure S40** HSQC spectrum of compound **5** in  $\text{CD}_3\text{OD}$

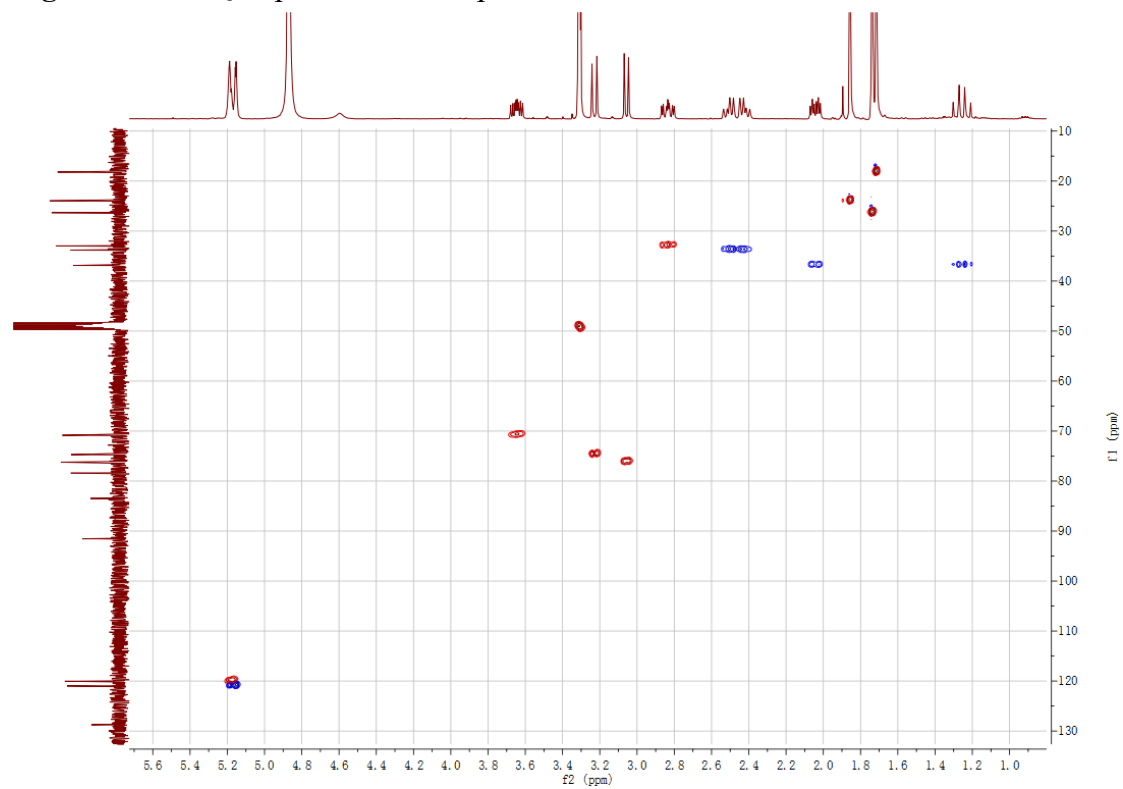

**Figure S41** HMBC spectrum of compound **5** in CD<sub>3</sub>OD

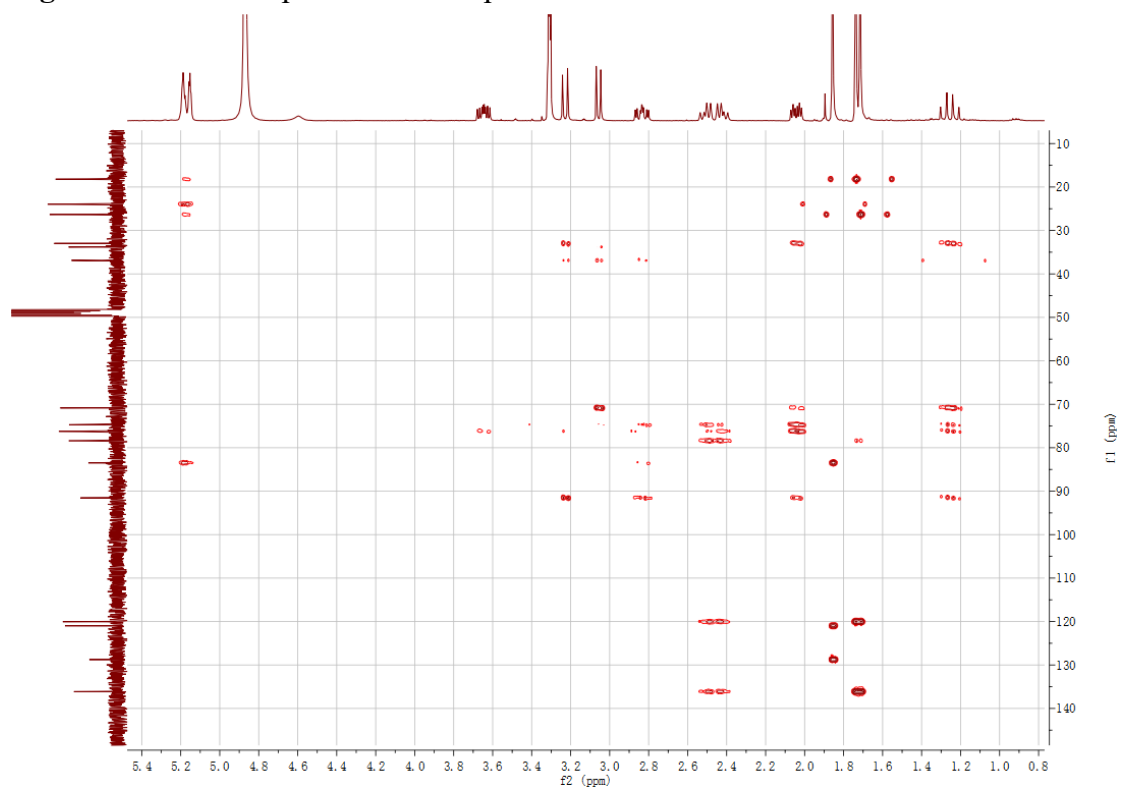

**Figure S42** NOESY spectrum of compound **5** in CD<sub>3</sub>OD

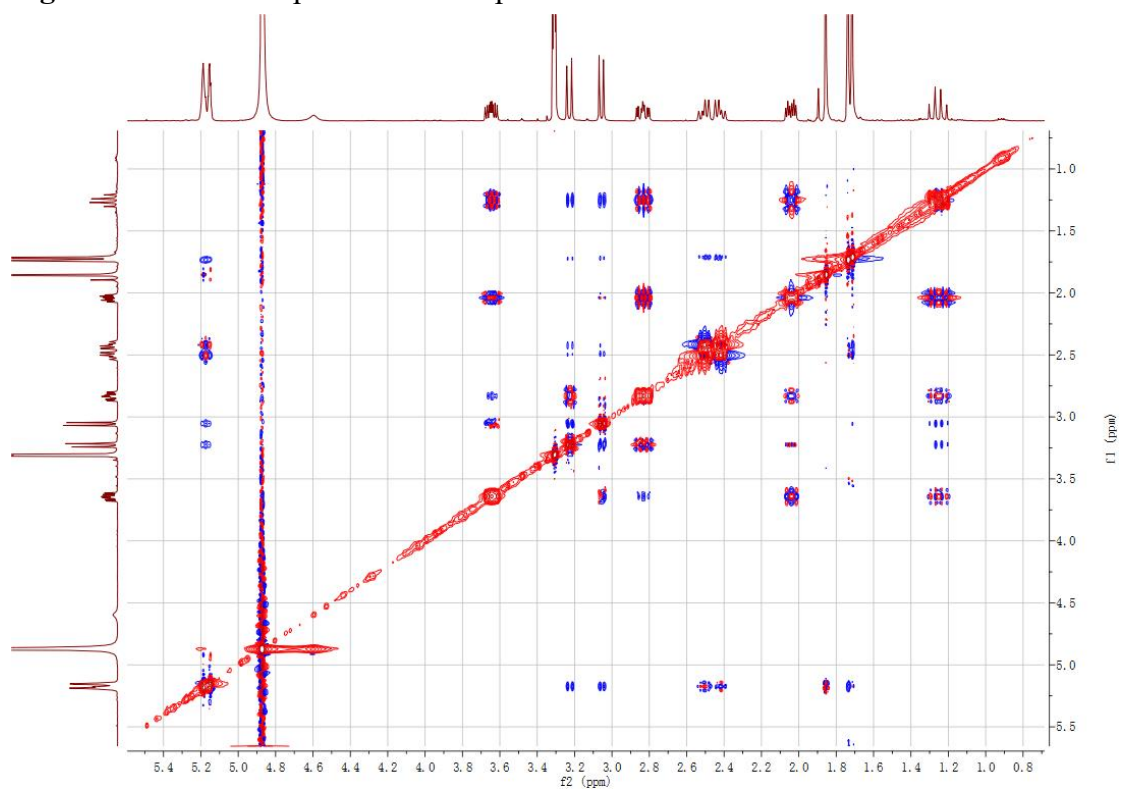



**Figure S43** HR-ESI-MS spectrum of compound **5**

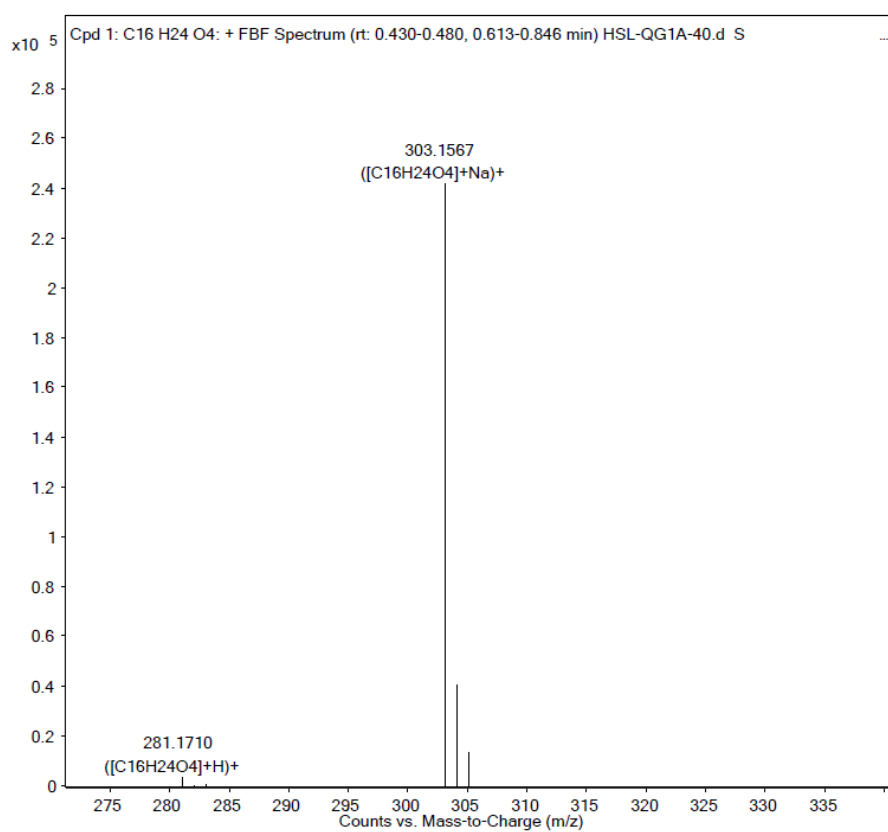

**Figure S44** UV spectrum of compound **5**

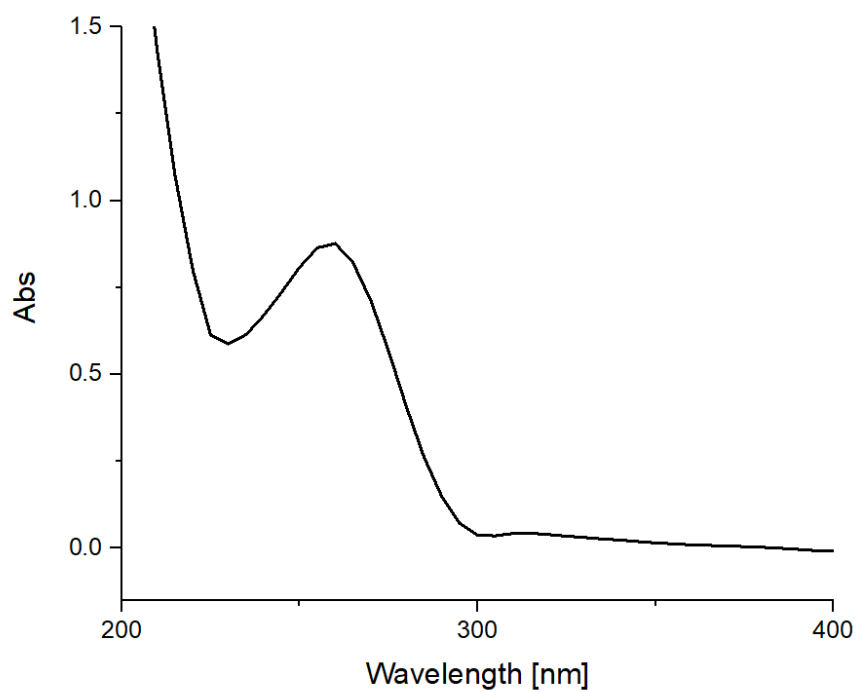

**Figure S45** IR spectrum of compound **5**

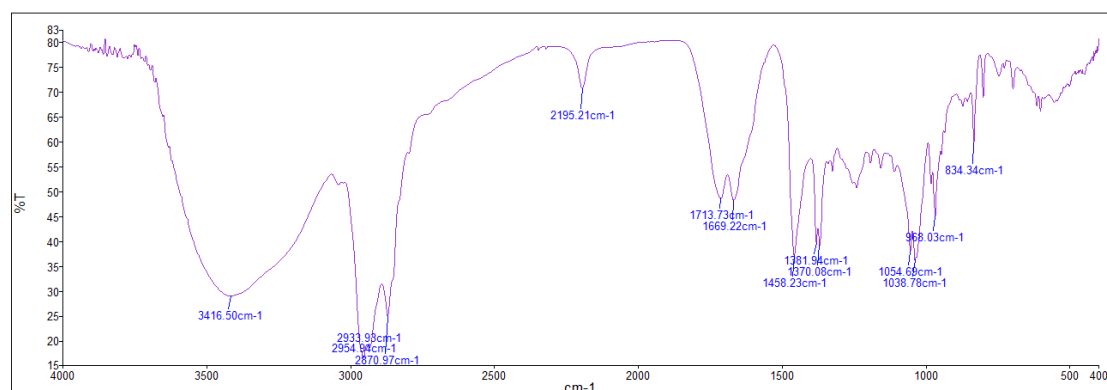

## Computational Section

### ECD calculation

Conformational analysis was initially performed using Confab at MMFF94 force field for new compound. Room-temperature equilibrium populations were calculated according to Boltzmann distribution law. The conformers with Boltzmann-population from above 1% were chosen for ECD calculations. The chosen conformer was optimized at B3LYP/6-311G\*\* using Density functional theory (DFT). Then, it was further optimized in gas phase using the CPCM polarizable conductor calculation model. The theoretical calculation of ECD was conducted using Time-dependent DFT (TD-DFT) method at B3LYP/6-311G\* in methanol. Rotatory strengths for total excited states were calculated. The ECD spectrum is simulated in SpecDis by overlapping Gaussian functions for each transition according to:

$$\Delta\epsilon(E) = \frac{1}{2.297 \times 10^{-39}} \times \frac{1}{\sqrt{2\pi}\sigma} \sum_i^A \Delta E_i R_i e^{-\left(\frac{E-E_i}{2\sigma}\right)^2}$$

where  $\sigma$  represents the width of the band at  $1/e$  height, and  $\Delta E_i$  and  $R_i$  are the excitation energies and rotatory strengths for transition  $i$ , respectively.  $\sigma = 0.2$ - $0.3$  eV and UV-

Shift = 5 nm and  $R^{\text{velocity}}$  have been used in this work.

**Table S1.** Energies of the dominative conformers of compounds **1-5**.

| Compounds                                                                    | No | Structure                                                                           | E (Hartree)   | Population (%) |
|------------------------------------------------------------------------------|----|-------------------------------------------------------------------------------------|---------------|----------------|
| (1 <i>R</i> , 2 <i>S</i> , 3 <i>R</i> , 4 <i>R</i> , 13 <i>R</i> )- <b>1</b> | 1  | 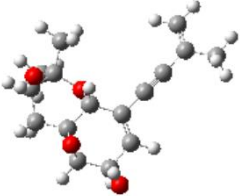   | -922.53787494 | 70.79          |
|                                                                              | 2  |    | -922.53685018 | 29.21          |
| (1 <i>R</i> , 2 <i>S</i> , 3 <i>R</i> , 4 <i>R</i> , 13 <i>R</i> )- <b>2</b> | 1  |   | -922.53356696 | 56.25          |
|                                                                              | 2  |  | -922.53351014 | 43.75          |
| (1 <i>R</i> , 2 <i>R</i> , 3 <i>S</i> , 4 <i>R</i> , 13 <i>R</i> )- <b>3</b> | 1  |  | -999.02684494 | 56.03          |
|                                                                              | 2  |  | -999.02543941 | 43.97          |
| (1 <i>R</i> , 2 <i>S</i> , 3 <i>R</i> , 4 <i>S</i> , 12 <i>R</i> )- <b>4</b> | 1  |  | -923.74831245 | 54.12          |

|                                                                             |   |                                                                                     |               |       |
|-----------------------------------------------------------------------------|---|-------------------------------------------------------------------------------------|---------------|-------|
|                                                                             | 2 | 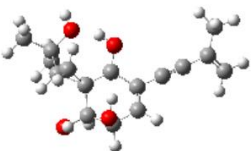   | -923.74788993 | 39.44 |
|                                                                             | 3 |    | -923.74520715 | 6.43  |
| (1 <i>S</i> , 2 <i>S</i> , 3 <i>R</i> , 4 <i>S</i> , 6 <i>S</i> )- <b>5</b> | 1 |    | -924.97692936 | 20.84 |
|                                                                             | 2 |    | -924.97677915 | 20.76 |
|                                                                             | 3 |  | -924.97666752 | 29.42 |
|                                                                             | 4 |  | -924.97722919 | 28.98 |

### <sup>13</sup>C NMR calculation

The <sup>13</sup>C NMR calculation of **3a** and **3b** were calculated with the GIAO method at the MPW1PW91/6-311+G(d,p) level with PCM. The shielding constants ( $\sigma$ ) were converted into chemical shifts ( $\delta$ ) by referencing to TMS at 0 ppm ( $\delta_{\text{cal}} = \sigma_{\text{TMS}} - \sigma_{\text{cal}}$ ), where the  $\sigma_{\text{TMS}}$  was the shielding constant of TMS calculated at the same level. The calculated chemical shifts were directly performed statistical analyses with experimental chemical shifts by using DP4+ method. The DP4+ probability, and linear correlation coefficients ( $R^2$ ), were adopted for evaluation of the results.

**Figure S46 Conformations of low-energy conformers of structures 3a and 3b.**

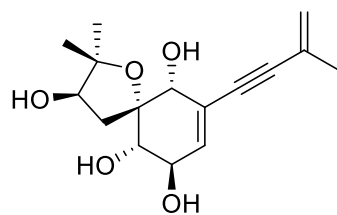

1*R*, 2*R*, 3*S*, 4*R*, 13*R*

**3a**

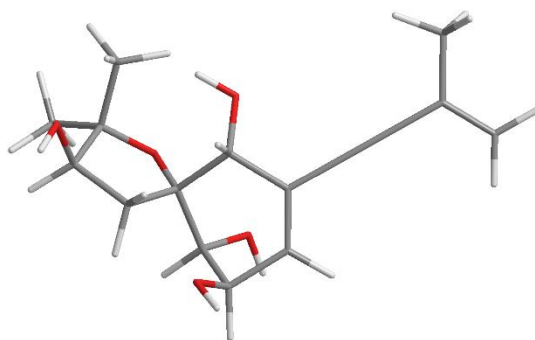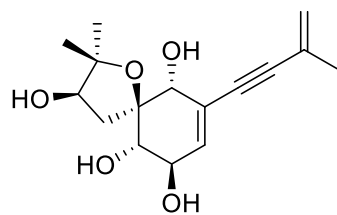

1*R*, 2*S*, 3*S*, 4*R*, 13*R*

**3b**

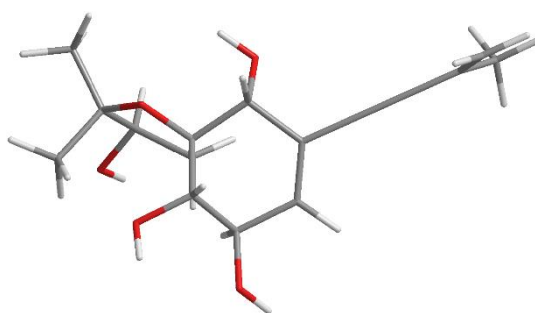

**Table S2** DP4+ analysis result table of model compounds **3a** and **3b**.

| NO | Experimental | <b>3a</b> | <b>3b</b> |
|----|--------------|-----------|-----------|
| 1  | 135.6        | 139.9442  | 139.6799  |
| 2  | 128.3        | 129.6029  | 129.5934  |
| 3  | 126.9        | 126.296   | 126.5934  |
| 4  | 122.5        | 122.8981  | 125.6672  |
| 5  | 92.4         | 95.1603   | 95.5666   |
| 6  | 89.8         | 88.5949   | 87.1109   |
| 7  | 87.1         | 86.4094   | 86.9531   |
| 8  | 86.5         | 85.6815   | 86.8295   |
| 9  | 78.8         | 76.2249   | 76.3838   |
| 10 | 76.9         | 75.9158   | 73.4216   |
| 11 | 74           | 71.5636   | 70.2743   |
| 12 | 73           | 71.7203   | 68.385    |
| 13 | 33.7         | 33.2928   | 29.5577   |
| 14 | 28.3         | 23.137    | 20.9278   |
| 15 | 23.8         | 19.9035   | 19.7076   |
| 16 | 23.5         | 16.9438   | 16.3642   |

**Figure S47** DP4+ probability analysis result.

| A          | B    | C            | D        | E             | F        | G               | H        |
|------------|------|--------------|----------|---------------|----------|-----------------|----------|
| Functional |      | Solvent?     |          | Basis Set     |          | Type of Data    |          |
| mPW1PW91   |      | PCM          |          | 6-311+G(d, p) |          | Unscaled Shifts |          |
|            |      | DP4+         | 100.00%  | 0.00%         | –        | –               | –        |
| Nuclei     | sp2? | Experimental | Isomer 1 | Isomer 2      | Isomer 3 | Isomer 4        | Isomer 5 |
| C          | x    | 135.6        | 139.9442 | 139.6799      |          |                 |          |
| C          | x    | 128.3        | 129.6029 | 129.5934      |          |                 |          |
| C          | x    | 126.9        | 126.296  | 126.5934      |          |                 |          |
| C          | x    | 122.5        | 122.8981 | 125.6672      |          |                 |          |
| C          |      | 92.4         | 95.1603  | 95.5666       |          |                 |          |
| C          |      | 89.8         | 88.5949  | 87.1109       |          |                 |          |
| C          |      | 87.1         | 86.4094  | 86.9531       |          |                 |          |
| C          |      | 86.5         | 85.6815  | 86.8295       |          |                 |          |
| C          |      | 78.8         | 76.2249  | 76.3838       |          |                 |          |
| C          |      | 76.9         | 75.9158  | 73.4216       |          |                 |          |
| C          |      | 74           | 71.5636  | 70.2743       |          |                 |          |
| C          |      | 73           | 71.7203  | 68.385        |          |                 |          |
| C          |      | 33.7         | 33.2928  | 29.5577       |          |                 |          |
| C          |      | 28.3         | 23.137   | 20.9278       |          |                 |          |
| C          |      | 23.8         | 19.9035  | 19.7076       |          |                 |          |
| C          |      | 23.5         | 16.9438  | 16.3642       |          |                 |          |

**Figure S48** Regression analyses of experimental versus calculated  $^{13}\text{C}$  NMR chemical shifts of model compounds **3a** and **3b**

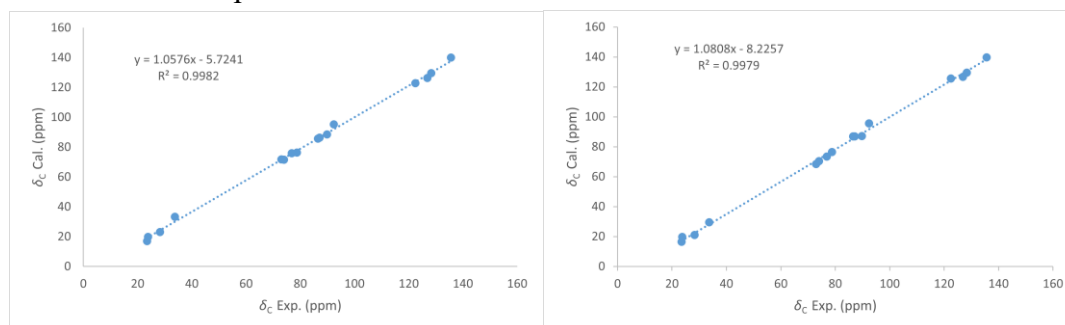

**Table S3.**  $^1\text{H}$  (400 MHz) and  $^{13}\text{C}$  (100 MHz) NMR, and COSY, HMBC and NOESY assignment of **1** in  $\text{CD}_3\text{OD}$ .

| No | <b>1</b>                   |                                       |      |                |                  |
|----|----------------------------|---------------------------------------|------|----------------|------------------|
|    | $\delta_{\text{C}}$ , type | $\delta_{\text{H}}$ ( <i>J</i> in Hz) | COSY | HMBC           | NOESY            |
| 1  | 67.8, CH                   | 4.46, t (2.0)                         |      | 2, 5, 6, 7, 14 | 12 $\alpha$ , 15 |
| 2  | 61.0, C                    |                                       |      |                |                  |
| 3  | 60.1, CH                   | 3.26, t (1.8)                         | 4    | 12             | 12 $\beta$       |
| 4  | 64.7, CH                   | 4.41, dt (5.3, 1.8)                   | 3, 5 | 2, 6           |                  |
| 5  | 133.2, CH                  | 5.93, dt (5.3, 2.0)                   | 4    | 1, 7           |                  |
| 6  | 123.3, C                   |                                       |      |                |                  |
| 7  | 86.8, C                    |                                       |      |                |                  |
| 8  | 93.3, C                    |                                       |      |                |                  |
| 9  | 128.3, C                   |                                       |      |                |                  |

|             |                        |                       |    |          |                |
|-------------|------------------------|-----------------------|----|----------|----------------|
| 10          | 122.3, CH <sub>2</sub> | 5.26, m               |    | 8, 9, 11 |                |
| 11          | 23.5, CH <sub>3</sub>  | 1.89, m               |    | 8, 9, 10 |                |
| 12 $\alpha$ | 36.3, CH <sub>2</sub>  | 2.27, dd (13.3, 12.0) | 13 | 2, 3     | 1, 15          |
| 12 $\beta$  | 36.3, CH <sub>2</sub>  | 1.57, dd (13.3, 5.0)  | 13 | 2, 3     | 3              |
| 13          | 73.2, CH               | 3.70, dd (12.0, 5.0)  | 12 | 14, 15   | 16             |
| 14          | 78.6, C                |                       |    |          |                |
| 15          | 16.5, CH <sub>3</sub>  | 1.30, s               |    | 13       | 1, 12 $\alpha$ |
| 16          | 28.2, CH <sub>3</sub>  | 1.33, s               |    | 1, 14    | 13             |

**Table S4.** <sup>1</sup>H (400 MHz) and <sup>13</sup>C (100 MHz) NMR, and COSY, HMBC and NOESY assignment of **2** in CD<sub>3</sub>OD.

| No          | <b>2</b>               |                              |      |                |                     |
|-------------|------------------------|------------------------------|------|----------------|---------------------|
|             | $\delta_C$ , type      | $\delta_H$ ( <i>J</i> in Hz) | COSY | HMBC           | NOESY               |
| 1           | 68.4, CH               | 4.42, t (2.4)                |      | 2, 5, 6, 7, 14 | 12 $\alpha$ , 15    |
| 2           | 57.4, C                |                              |      |                |                     |
| 3           | 58.6, CH               | 3.26, t (2.3)                | 4    | 2, 12          | 12 $\beta$          |
| 4           | 66.9, CH               | 4.46, dd (4.5, 2.3)          | 3, 5 | 6              |                     |
| 5           | 134.7, CH              | 5.73, dd (4.5, 2.4)          | 4    | 1, 6, 7        |                     |
| 6           | 121.6, C               |                              |      |                |                     |
| 7           | 86.7, C                |                              |      |                |                     |
| 8           | 92.3, C                |                              |      |                |                     |
| 9           | 128.5, C               |                              |      |                |                     |
| 10          | 121.9, CH <sub>2</sub> | 5.24, m                      |      | 8, 9, 11       |                     |
| 11          | 23.5, CH <sub>3</sub>  | 1.88, m                      |      | 8, 9           |                     |
| 12 $\alpha$ | 34.9, CH <sub>2</sub>  | 2.72, dd (14.8, 3.3)         | 13   | 2, 3, 14       | 1, 15               |
| 12 $\beta$  | 34.9, CH <sub>2</sub>  | 1.55, dd (14.8, 2.7)         | 13   | 2, 3, 14       | 3                   |
| 13          | 72.4, CH               | 3.62, dd (3.3, 2.7)          | 12   | 14             | 15                  |
| 14          | 78.0, C                |                              |      |                |                     |
| 15          | 26.4, CH <sub>3</sub>  | 1.32, s                      |      | 14             | 1, 12 $\alpha$ , 13 |
| 16          | 22.3, CH <sub>3</sub>  | 1.37, s                      |      | 14             |                     |

**Table S5.** <sup>1</sup>H (400 MHz) and <sup>13</sup>C (100 MHz) NMR, and COSY, HMBC and NOESY assignment of **3** in CD<sub>3</sub>OD.

| No | <b>3</b>          |                              |      |             |                      |
|----|-------------------|------------------------------|------|-------------|----------------------|
|    | $\delta_C$ , type | $\delta_H$ ( <i>J</i> in Hz) | COSY | HMBC        | NOESY                |
| 1  | 74.0, CH          | 4.04, t (2.5)                |      | 2, 5, 6, 12 | 3, 12 $\beta$        |
| 2  | 89.8, C           |                              |      |             |                      |
| 3  | 76.9, CH          | 3.51, d (8.1)                | 4    | 1, 2, 12    | 1                    |
| 4  | 73.0, CH          | 3.97, dt (8.1, 2.8)          | 3, 5 | 2           | 12 $\alpha$ , 13, 15 |
| 5  | 135.6, CH         | 5.85, dd (2.8, 2.5)          | 4    | 1, 6, 7     |                      |
| 6  | 126.9, C          |                              |      |             |                      |
| 7  | 87.1, C           |                              |      |             |                      |
| 8  | 92.4, C           |                              |      |             |                      |
| 9  | 128.3, C          |                              |      |             |                      |

|             |                        |                      |    |            |            |
|-------------|------------------------|----------------------|----|------------|------------|
| 10          | 122.5, CH <sub>2</sub> | 5.28, m              |    | 8, 9       |            |
| 11          | 23.5, CH <sub>3</sub>  | 1.90, m              |    | 8, 9, 10   |            |
| 12 $\alpha$ | 33.7, CH <sub>2</sub>  | 1.79, dd (13.9, 1.8) | 13 | 2, 14      | 4          |
| 12 $\beta$  | 33.7, CH <sub>2</sub>  | 2.48, dd (13.9, 6.3) | 13 | 2, 14      | 1, 16      |
| 13          | 78.8, CH               | 3.87, dd (6.3, 1.8)  | 12 | 2, 14      | 4          |
| 14          | 86.5, C                |                      |    |            |            |
| 15          | 28.3, CH <sub>3</sub>  | 1.26, s              |    | 13, 14, 16 | 4          |
| 16          | 23.8, CH <sub>3</sub>  | 1.27, s              |    | 14         | 12 $\beta$ |

**Table S6.** <sup>1</sup>H (400 MHz) and <sup>13</sup>C (100 MHz) NMR, and COSY, HMBC and NOESY assignment of **4** in CD<sub>3</sub>OD.

| No | <b>4</b>               |                                            |      |            |       |
|----|------------------------|--------------------------------------------|------|------------|-------|
|    | $\delta_C$ , type      | $\delta_H$ ( <i>J</i> in Hz)               | COSY | HMBC       | NOESY |
| 1  | 74.1, CH               | 3.73, s                                    |      | 2, 3, 6, 7 | 3, 13 |
| 2  | 30.6, C                |                                            |      |            |       |
| 3  | 73.1, CH               | 4.01, d (5.2)                              | 4    | 1, 12      | 1     |
| 4  | 72.4, CH               | 4.13, m                                    | 3, 5 |            |       |
| 5  | 136.2, CH              | 6.02, d (3.2)                              | 4    | 1, 6, 7    |       |
| 6  | 127.5, C               |                                            |      |            |       |
| 7  | 88.4, C                |                                            |      |            |       |
| 8  | 92.0, C                |                                            |      |            |       |
| 9  | 128.3, C               |                                            |      |            |       |
| 10 | 122.3, CH <sub>2</sub> | 5.26, m                                    |      | 8, 9, 11   |       |
| 11 | 23.6, CH <sub>3</sub>  | 1.90, m                                    |      | 9, 10      |       |
| 12 | 7.9, CH <sub>2</sub>   | 0.92, dd (9.7, 4.8)<br>0.81, dd (7.5, 4.8) | 13   | 2, 3       |       |
| 13 | 34.3, CH               | 1.21, m                                    | 12   | 1          | 1     |
| 14 | 70.1, C                |                                            |      |            |       |
| 15 | 31.7, CH <sub>3</sub>  | 1.36, s                                    |      | 13, 14     |       |
| 16 | 29.7, CH <sub>3</sub>  | 1.25, s                                    |      | 13, 14     |       |

**Table S7.** <sup>1</sup>H (400 MHz) and <sup>13</sup>C (100 MHz) NMR, and COSY, HMBC and NOESY assignment of **5** in CD<sub>3</sub>OD.

| No         | <b>5</b>              |                              |      |      |                           |
|------------|-----------------------|------------------------------|------|------|---------------------------|
|            | $\delta_C$ , type     | $\delta_H$ ( <i>J</i> in Hz) | COSY | HMBC | NOESY                     |
| 1          | 74.7, CH              | 3.23, d (10.5)               | 6    | 8    | 3, 5 $\beta$ , 12 $\beta$ |
| 2          | 78.4, C               |                              |      |      |                           |
| 3          | 76.2, CH              | 3.06, d (9.3)                | 4    | 12   | 1, 5 $\beta$              |
| 4          | 70.9, CH              | 3.65, m                      | 3, 5 |      | 6                         |
| 5 $\alpha$ | 36.9, CH <sub>2</sub> | 2.04, dt (13.2, 4.6)         | 4, 6 |      |                           |
| 5 $\beta$  | 36.9, CH <sub>2</sub> | 1.26, m                      | 4, 6 |      | 1, 3                      |
| 6          | 33.0, CH              | 2.83, m                      | 5, 1 | 7, 8 | 4                         |
| 7          | 83.5, C               |                              |      |      |                           |
| 8          | 91.6, C               |                              |      |      |                           |



|             |                        |                      |    |            |   |
|-------------|------------------------|----------------------|----|------------|---|
| 9           | 128.8, C               |                      |    |            |   |
| 10          | 121.0, CH <sub>2</sub> | 5.19, m              |    | 7, 11      |   |
|             |                        | 5.15, m              |    |            |   |
| 11          | 24.0, CH <sub>3</sub>  | 1.86 m               |    | 9, 10      |   |
| 12 $\alpha$ | 33.8, CH <sub>2</sub>  | 2.51, dd (13.4, 7.9) | 13 | 1, 2, 3    |   |
| 12 $\beta$  | 33.8, CH <sub>2</sub>  | 2.42, dd (13.4, 7.8) | 13 | 1, 2, 3    | 1 |
| 13          | 120.1, CH              | 5.18, m              | 12 | 15, 16     |   |
| 14          | 136.1, C               |                      |    |            |   |
| 15          | 26.3, CH <sub>3</sub>  | 1.74, s              |    | 13, 14, 16 |   |
| 16          | 18.2, CH <sub>3</sub>  | 1.71, s              |    | 13, 14, 15 |   |

**Table S8.** <sup>1</sup>H (400 MHz) and <sup>13</sup>C (100 MHz) NMR of **6-8** in CD<sub>3</sub>OD.

| No | <b>6</b>   |                              | <b>7</b>   |                              | <b>8</b>   |                              |
|----|------------|------------------------------|------------|------------------------------|------------|------------------------------|
|    | $\delta_C$ | $\delta_H$ ( <i>J</i> in Hz) | $\delta_C$ | $\delta_H$ ( <i>J</i> in Hz) | $\delta_C$ | $\delta_H$ ( <i>J</i> in Hz) |
| 1  | 68.3       | 4.60, t (1.9)                | 78.0       | 4.25, s                      | 67.6       | 4.17, t (2.0)                |
| 2  | 58.1       |                              | 32.2       |                              | 63.3       |                              |
| 3  | 57.5       | 3.14, t (2.1)                | 75.3       | 3.44, m                      | 60.4       | 3.34, overlapped             |
| 4  | 64.9       | 4.44, dt (5.5, 1.9)          | 69.2       | 4.14, dd (5.2, 1.1)          | 66.2       | 4.43, dd (5.0, 2.5)          |
| 5  | 133.0      | 5.93, dt (5.5, 2.2)          | 134.4      | 6.10, d (5.2)                | 134.3      | 5.76, dd (4.5, 2.5)          |
| 6  | 123.8      |                              | 129.4      |                              | 124.5      |                              |
| 7  | 86.9       |                              | 88.2       |                              | 87.6       |                              |
| 8  | 93.4       |                              | 92.5       |                              | 91.6       |                              |
| 9  | 128.4      |                              | 128.4      |                              | 128.4      |                              |
| 10 | 122.2      | 5.24, s                      | 122.3      | 5.28, dd (3.8, 3.0)          | 122.2      | 5.28, m; 5.25, m             |
|    |            |                              |            | 5.26, m                      |            |                              |
| 11 | 23.5       | 1.89, t (1.1)                | 23.6       | 1.90, d (1.1)                | 23.5       | 1.90, m                      |
| 12 | 34.8       | 2.71, dd (14.8, 3.3)         | 12.3       | 0.69, m                      | 32.2       | 2.93, dd (14.7, 8.9)         |
|    |            | 1.55, dd (14.8, 2.9)         |            |                              |            | 2.16, dd (14.7, 6.2)         |
| 13 | 72.6       | 3.64, t (2.9)                | 33.5       | 1.69, dd (7.8, 4.6)          | 118.9      | 5.13, m                      |
| 14 | 78.1       |                              | 83.9       |                              | 136.7      |                              |
| 15 | 22.3       | 1.39, s                      | 28.5       | 1.37, s                      | 18.1       | 1.69, s                      |
| 16 | 26.4       | 1.32, s                      | 26.0       | 1.20, s                      | 26.0       | 1.74, s                      |
